# Supplementary material for: Association between B-cell depletion and attack risk in neuromyelitis optica spectrum disorder: An exploratory analysis from N-MOmentum, a double-blind, randomised, placebo-controlled, multicentre phase 2/3 trial
Source: eBioMedicine. 2022 Nov 10;86:104321. doi: 10.1016/j.ebiom.2022.104321 (PMC9664402; doi:10.1016/j.ebiom.2022.104321)
Supplement: Supplementary Material [file mmc2.pdf]

# **Association between B-cell depletion and attack risk in neuromyelitis optica spectrum disorder: An exploratory analysis from N-MOMentum, a double-blind, randomised, placebo-controlled, multicentre phase 2/3 trial**

## **Online supplementary information**

### **Authors**

Jeffrey L Bennett,<sup>a</sup> Orhan Aktas,<sup>b</sup> William A Rees,<sup>c</sup> Michael A Smith,<sup>c</sup> Michele Gonsior,<sup>c\*</sup> Li Yan,<sup>c\*</sup> Dewei She,<sup>c</sup> Daniel Cimbora,<sup>c</sup> Sean J Pittock,<sup>d</sup> Brian G Weinshenker,<sup>e</sup> Friedemann Paul,<sup>f</sup> Romain Marignier,<sup>g</sup> Dean Wingerchuk,<sup>h</sup> Gary Cutter,<sup>i</sup> Ari Green,<sup>j</sup> Hans-Peter Hartung,<sup>b,k,l,m</sup> Ho Jin Kim,<sup>n</sup> Kazuo Fujihara,<sup>o</sup> Michael Levy,<sup>p</sup> Eliezer Katz,<sup>c\*</sup> and Bruce AC Cree,<sup>q</sup> on behalf of the N-MOMentum study investigators

### **Affiliations**

<sup>a</sup>University of Colorado School of Medicine, Anschutz Medical Campus, University of Colorado, Aurora, CO, USA; <sup>b</sup>Medical Faculty, Heinrich Heine University Düsseldorf, Düsseldorf, Germany; <sup>c</sup>Horizon Therapeutics plc, Gaithersburg, MD, USA; <sup>d</sup>Mayo Clinic and Center for MS and Autoimmune Neurology, Rochester, MN, USA; <sup>e</sup>Mayo Clinic, Rochester, MN, USA; <sup>f</sup>Experimental and Clinical Research Center, Max Delbrück Center for Molecular Medicine and Charité – Universitätsmedizin Berlin, Corporate Member of Freie Universität Berlin and Humboldt-Universität zu Berlin, Berlin, Germany; <sup>g</sup>Service de Neurologie, Sclérose en Plaques, Pathologies de la Myéline et Neuroinflammation, Hôpital Neurologique Pierre Wertheimer, Hospices Civils de Lyon, Lyon, France; <sup>h</sup>Department of Neurology, Mayo Clinic, Scottsdale, AZ, USA; <sup>i</sup>University of Alabama at Birmingham, Birmingham, AL, USA; <sup>j</sup>UCSF Weill Institute for Neurosciences, Department of Neurology and Department of Ophthalmology, University of California San Francisco, San Francisco, CA, USA; <sup>k</sup>Brain and Mind Centre, University of Sydney, Sydney, NSW, Australia; <sup>l</sup>Department of Neurology, Medical University Vienna, Vienna, Austria; <sup>m</sup>Department of Neurology, Palacky University in Olomouc, Olomouc, Czech Republic; <sup>n</sup>Department of Neurology, Research Institute and Hospital of National Cancer Center, Goyang, South Korea; <sup>o</sup>Department of Multiple Sclerosis Therapeutics, Fukushima Medical University and Multiple Sclerosis and Neuromyelitis Optica Center, Southern Tohoku Research Institute for Neuroscience, Koriyama, Japan; <sup>p</sup>Department of Neurology, Massachusetts General Hospital and Harvard Medical School, Boston, MA, USA; <sup>q</sup>UCSF Weill Institute for Neurosciences, Department of Neurology, University of California San Francisco, San Francisco, CA, USA;

\*Former employee of Horizon Therapeutics

## Contents

|                                                                                                                                                                                                              |    |
|--------------------------------------------------------------------------------------------------------------------------------------------------------------------------------------------------------------|----|
| Supplementary Methods.....                                                                                                                                                                                   | 3  |
| Supplementary Figure 1: CD19: a differentiated target for B-cell depletion. ....                                                                                                                             | 6  |
| Supplementary Figure 2: N-MOMentum study.....                                                                                                                                                                | 7  |
| Supplementary Figure 3: B-cell counts for individual participants at the time of attacks. ....                                                                                                               | 10 |
| Supplementary Figure 4. Rate ratios of disease activity based on cut-off points of B-cell level following first dosing interval and sensitivity analyses.....                                                | 13 |
| Supplementary Figure 5. Disease activity outcomes over time with inebilizumab treatment..                                                                                                                    | 15 |
| Supplementary Figure 6. PK of inebilizumab in participants with 6-month B-cell counts >4 cells/ $\mu$ L or $\leq$ 4 cells/ $\mu$ L.....                                                                      | 17 |
| Supplementary Figure 7. Baseline B-cell count, plasma cell gene signature, and total Ig of participants with >4 cells/ $\mu$ L or $\leq$ 4 cells/ $\mu$ L after the first dosing period with inebilizumab. . | 18 |
| Supplementary Figure 8. CD20+ B-cell counts grouped according to W28 response and corresponding proportion of rs396991 F/F homozygotes. ....                                                                 | 19 |
| Supplementary Figure 9. Relationship between CD20+ B-cell counts and ADA. ....                                                                                                                               | 20 |
| Supplementary Table 1. Reagents used for flow cytometry analyses.....                                                                                                                                        | 21 |
| Supplementary Table 2. List of institutional ethics committees or institutional review boards for N-MOMentum.....                                                                                            | 22 |
| Supplementary Table 3. Kinetics of B-cell and immunoglobulin depletion during the study..                                                                                                                    | 35 |
| Supplementary Table 4. Decreases in NMOSD progression observed with long-term inebilizumab treatment.....                                                                                                    | 38 |
| Supplementary Table 5. 6-month B-cell counts versus long-term disease activity in participants divided by RCP treatment group.....                                                                           | 42 |
| Supplementary References .....                                                                                                                                                                               | 43 |

## **SUPPLEMENTARY METHODS**

### **Study design of N-MOmentum**

N-MOmentum was a multicentre, double-blind, randomised, placebo-controlled phase 2/3 study of the safety and efficacy of inebilizumab in adult participants with neuromyelitis optica spectrum disorder (NMOSD) that ran from April 2015 to November 2020. A total of 99 outpatient specialty clinics of hospitals from 25 countries participated in N-MOmentum, which was divided into two portions: the randomised controlled period (RCP) and the open-label period (OLP). Participants finished the RCP after 197 days in the study or after a diagnosed attack; after the RCP, participants could enter the OLP.

### **Participants in N-MOmentum**

Inclusion criteria included adult age ( $\geq 18$  years), diagnosis of NMOSD, Expanded Disability Status Scale (EDSS) score of 8.0 or less, and a history of either at least one attack requiring rescue therapy during the year before screening, or two attacks in the 2 years before screening. Participants who were seropositive for immunoglobulin (Ig) G antibodies against the aquaporin-4 water channel (AQP4-IgG) or AQP4-IgG seronegative were eligible; however, patients who were seronegative needed to meet the NMOSD criteria described by Wingerchuck and colleagues.<sup>1</sup> Exclusion criteria included potential pregnancy, any condition that would interfere with the study results, uncontrolled hypertension, concurrent enrolment in another clinical study involving investigational treatment, or inability to undergo magnetic resonance imaging (MRI).

### **Treatment in N-MOmentum**

Participants were randomly allocated 3:1 to receive inebilizumab or placebo during the RCP. This unequal randomisation scheme was used to minimise the total number of placebo participants needed. During the RCP, participants received intravenous inebilizumab 300 mg or placebo on days 1 and 15. Participants finished the RCP after 197 days in the study or after a diagnosed attack; after the RCP, participants could enter the OLP. Participants in the OLP received intravenous inebilizumab 300 mg on day 1 of the OLP and every 6 months afterwards for the duration of the enrolment; participants who had been randomised to placebo during the RCP received an extra dose of inebilizumab 300 mg on day 15 of the OLP. For analysis purposes, participants were divided into three groups: “RCP inebilizumab” (participants randomised to inebilizumab during the RCP), “RCP placebo” (participants randomised to placebo during the RCP), and “any inebilizumab” (participants who received

inebilizumab at any point during the study, including those from the RCP inebilizumab group and all participants in the OLP).

### **Key outcomes in N-MOmentum**

The primary endpoint of N-MOmentum was time from day 1 of the RCP to the onset of a diagnosed NMOSD attack on or before the end of the RCP. Key secondary endpoints included worsening of EDSS score from baseline, cumulative number of new/enlarging T2 MRI lesions, and cumulative number of NMOSD-related inpatient hospitalisations.

This study had an independent data monitoring committee (IDMC) that monitored trial safety and progress and convened at 12 pre-planned review meetings and additional ad hoc meetings before data were unblinded. The IDMC planned to perform an unblinded interim futility analysis when half of the expected NMOSD attacks had occurred; this analysis was performed on 14 November 2017, and the study was found not futile because the predictive power was calculated to be over 20%. The IDMC was firewalled from the rest of the blinded sponsor study team, and the sponsor and sites remained blinded to the treatment analyses during the entire study. The protocol included a planned enrolment halt when 67 NMOSD attacks were diagnosed, when 252 participants had been randomised and dosed, or following an IDMC recommendation, whichever happened first. On 7 September 2018, the IDMC recommended stopping the RCP because of a clear demonstration of efficacy of treatment and owing to the unethical nature of continuing to expose placebo-treated participants to further risk of attacks. This demonstration of efficacy was unlikely to be altered by continuing enrolment or the study. Following this recommendation, recruitment was stopped; the number of participants was 22 below the target and the number of diagnosed NMOSD attacks was 24 below the target. The final proportion of randomised participants to each treatment maintained the planned 3:1 ratio of inebilizumab to placebo treatment allocation.

### **Statistics in N-MOmentum**

The study was designed to detect a relative reduction related to inebilizumab of 60% in time to NMOSD attack during the RCP with at least 90% power and a two-sided significance level of 5%, assuming an unequal randomisation ratio of 3:1 (inebilizumab : placebo) and that placebo participants would only receive placebo for 197 days at the most. The original sample size calculation concluded that 212 participants would need to be recruited to reach 67 attacks during the RCP. This target was calculated by assuming hazard rates of 1·5 per year and 1·0 per year for an attack in the placebo arm for AQP4-IgG seropositive and

seronegative participants, respectively. These hazard rates were based on observed attack rates in published NMOSD open-label cohort studies.<sup>2-6</sup>

An interim sample size re-assessment was initially planned to be executed before a planned futility analysis to protect against the loss of statistical power in the seropositive cohort, as well as in the overall population owing to the required number of events not being achieved. However, the protocol was amended on 15 December 2016 in collaboration with the US Food and Drug Administration and the pre-planned sample size re-assessment was removed. The enrolment target was revised to 252, which was calculated to provide a 90% probability of reaching 67 attacks based on the attack rate observed for the first 78 participants enrolled.

### **Models used for B-cell dynamics analyses**

Relationships between depletion groups and treatment outcomes for summarisation were estimated by negative binomial regression using the following models.

- Figure 2: the glm.nb function from MASS: `glm.nb(Count ~ time + offset(log(timeElapsed)))`, where each time point 'time' was coded as a factor. The predict and confint functions were used to generate point estimates for each time interval along with 95% confidence intervals (CIs).
- Figure 5: we used a similar model to the one described above: `glm.nb(value ~ group:time+time+group+offset(log(timeElapsed)))`.
- Supplementary Figure 4: the same model was used as in Figure 5 but with AQP4-IgG seropositive participants instead of the intention-to-treat population.
- Table 1: `glm.nb(value ~ log10(B cell counts) + offset(log(timeElapsed)))`.
- Table 2: the analysis substituted in the rates estimated from the placebo group in the RCP in Figure 5 for the first column, then we used the model: `glm.nb(value ~ group+offset(log(timeElapsed)))` and predict and confint functions to generate point estimates and 95% CIs to estimate post-6-month disease activity as a function of B-cell counts  $>4$  cells/ $\mu$ L or  $\leq 4$  cells/ $\mu$ L at 6 months.

## SUPPLEMENTARY FIGURES

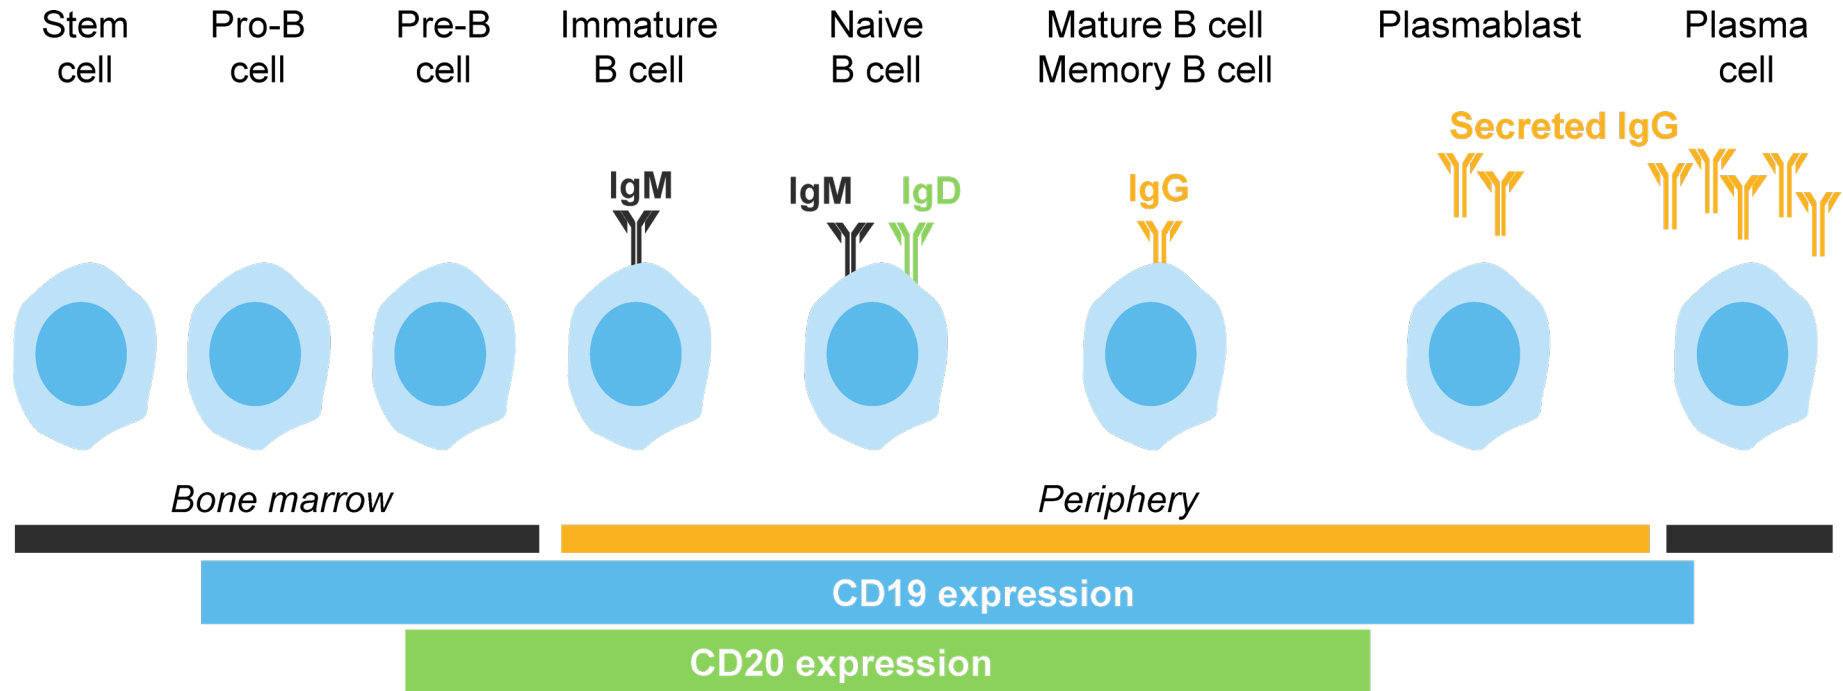

**Supplementary Figure S1. CD19: a differentiated target for B-cell depletion.**

Ig=Immunoglobulin.

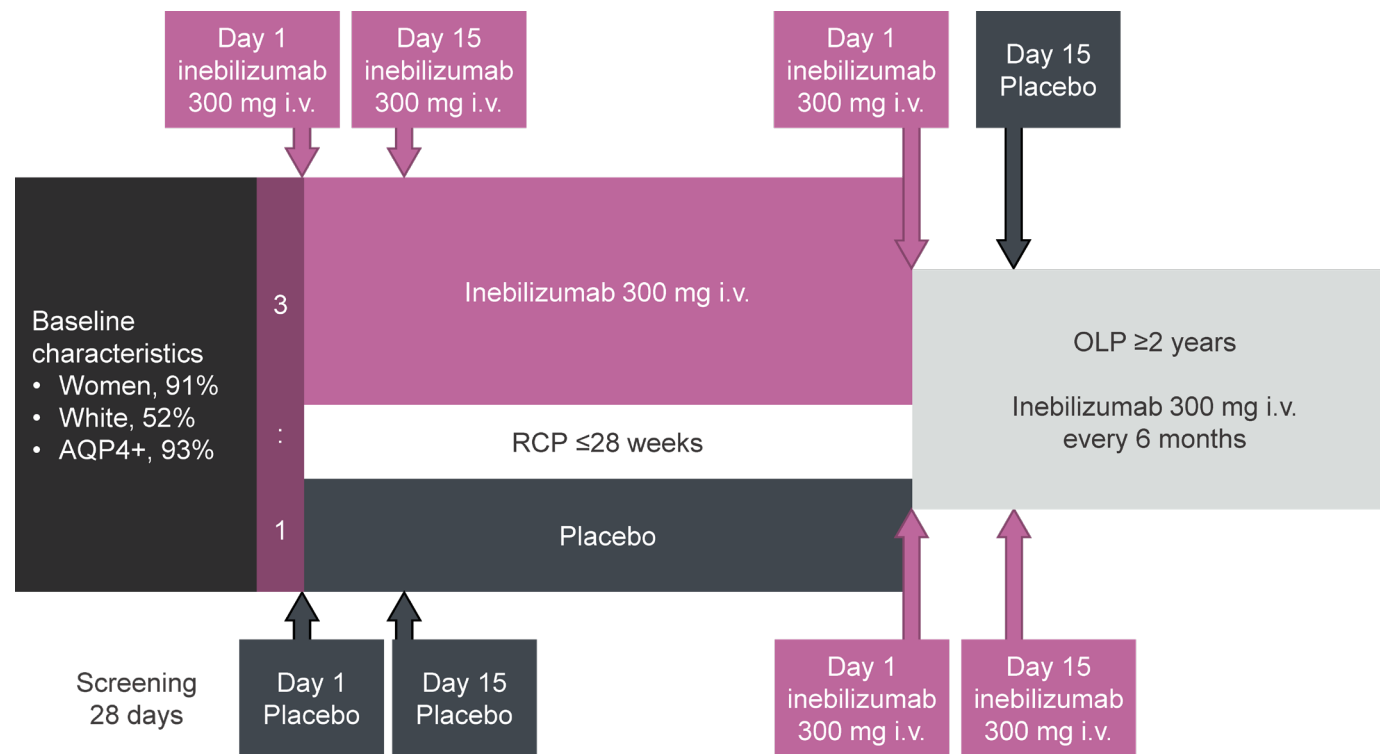

**Supplementary Figure S2. N-MOmentum study design.** N-MOmentum was a multicentre, double-blind, randomised, placebo-controlled phase 2/3 study of the safety and efficacy of inebilizumab in adult participants with NMOSD that ran from April 2015 to November 2020. A total of 99 outpatient specialty clinics of hospitals from 25 countries participated in N-MOmentum, which was divided into two portions: RCP and OLP. During the RCP, participants received inebilizumab 300 mg i.v. or placebo on days 1 and 15. Participants finished the RCP after 197 days in the study or after a diagnosed attack; after the RCP, participants could enter the OLP. Participants in the OLP received inebilizumab 300 mg i.v. on day 1 of the OLP and every 6 months afterwards for the duration of the enrolment; participants who had been randomised to placebo during the RCP received an extra dose of inebilizumab 300 mg on day 15 of the OLP. This study had an independent data monitoring committee (IDMC) that monitored trial safety and progress and convened at 12 pre-planned review meetings and additional ad hoc meetings before data were unblinded. The IDMC planned to perform an unblinded interim futility analysis when half of the expected NMOSD attacks had occurred; this analysis was performed on 14 November 2017, and the study was found not futile because the predictive power was calculated to be over 20%. The IDMC was firewalled from the rest of the blinded sponsor study team, and the sponsor and sites remained blinded to the treatment analyses during the entire study. The protocol included a planned enrolment halt when 67 NMOSD attacks were diagnosed, when

252 participants had been randomised and dosed, or following an IDMC recommendation, whichever happened first. On 7 September 2018, the IDMC recommended stopping the RCP because of a clear demonstration of efficacy of treatment and owing to the unethical nature of continuing to expose placebo-treated participants to further risk of attacks. Following this recommendation, recruitment was stopped; the number of participants was 22 below the target and the number of diagnosed NMOSD attacks was 24 below the target.

**Total CD20+ B-cell counts in participants who experienced attacks after third inebilizumab exposure (patients 1–5)**

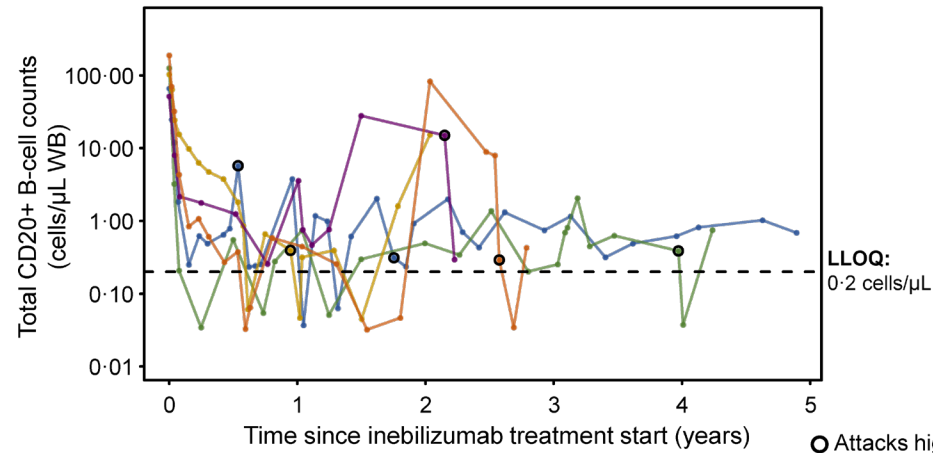

**Total CD20+ B-cell counts in participants who experienced attacks after third inebilizumab exposure (patients 6–10)**

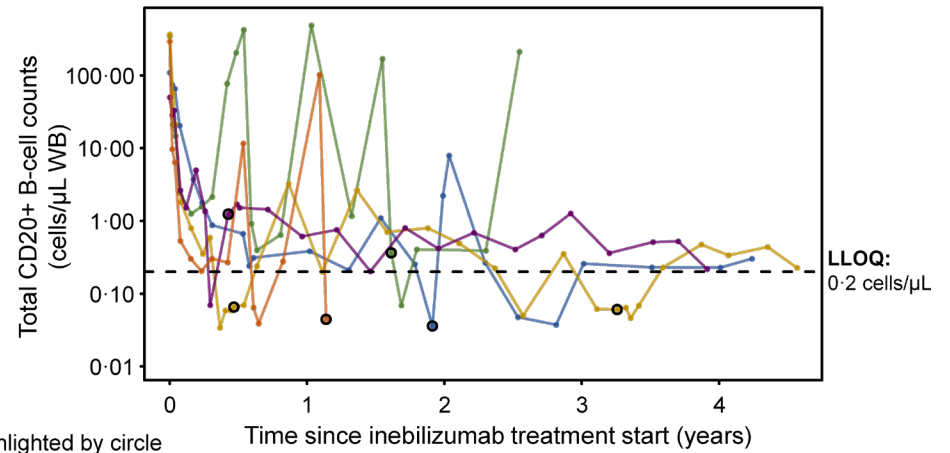

**Total CD20+ B-cell counts in participants who experienced attacks after third inebilizumab exposure (patients 11–15)**

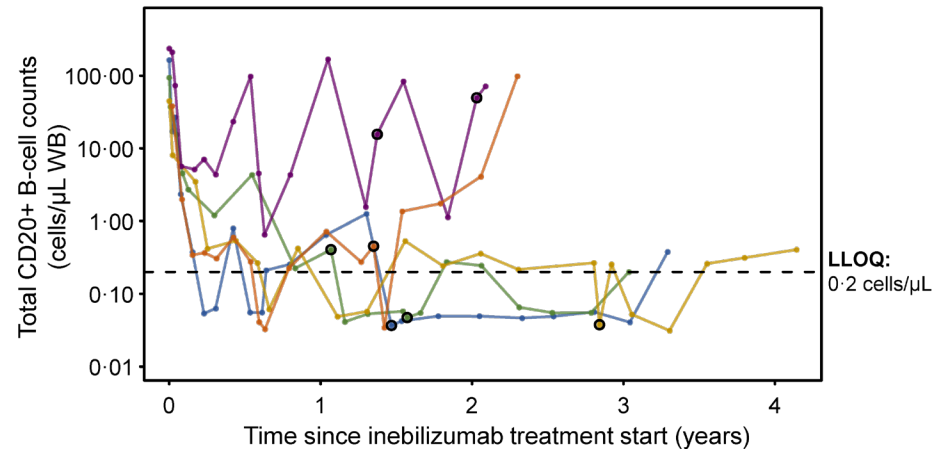

**Total CD20+ B-cell counts in participants who experienced attacks after third inebilizumab exposure (patients 16–22)**

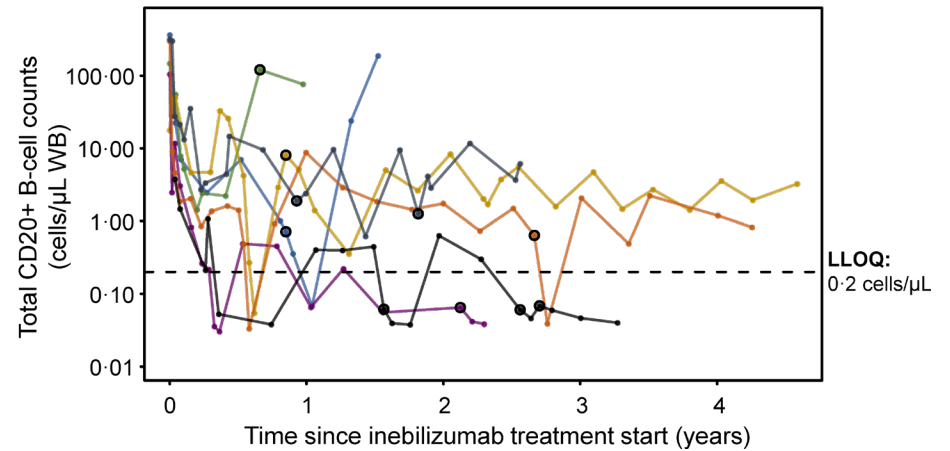

**b**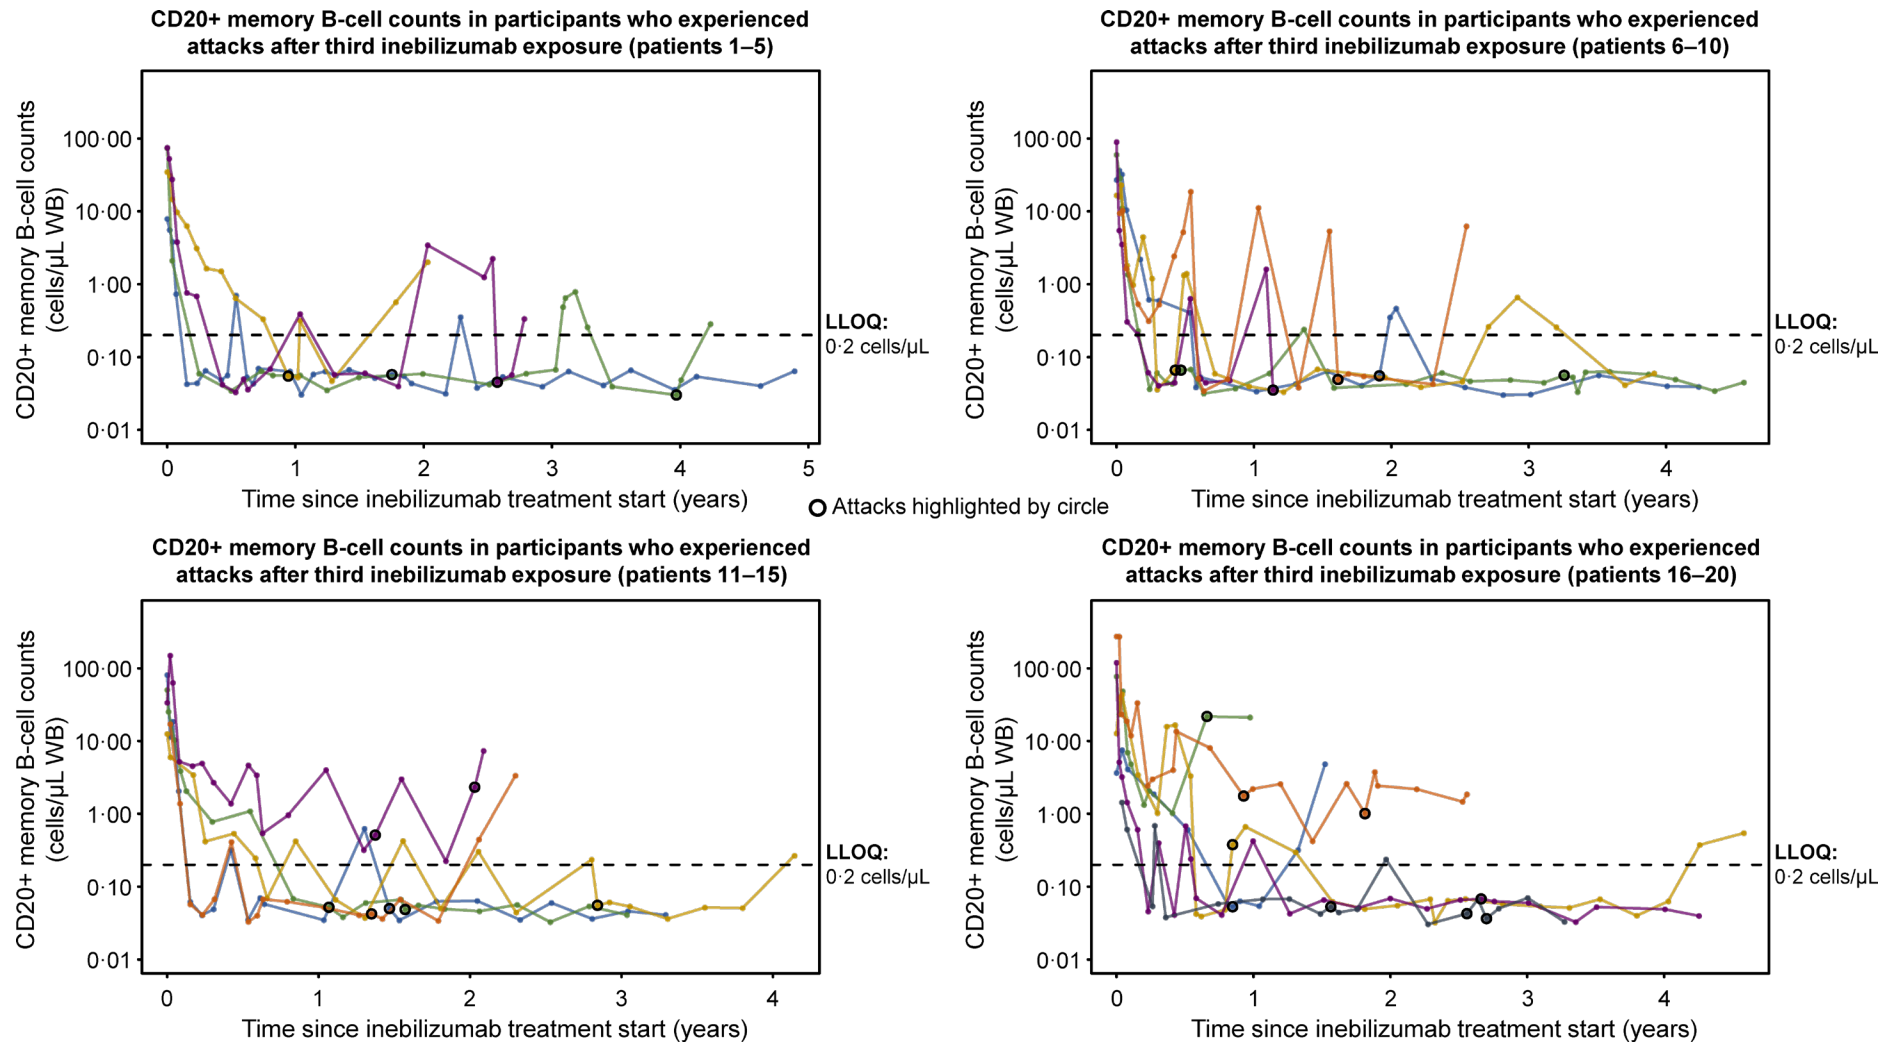

**Supplementary Figure S3. B-cell counts for individual participants at the time of attacks. (a)** Total CD20+ and **(b)** CD20+ memory B-cell counts over time of participants with more than two inebilizumab doses who experienced attacks. Each sub-panel contains data from five participants; each participant is represented by a coloured line. LLOQ=Lower Limit Of Quantification, WB=Whole Blood.

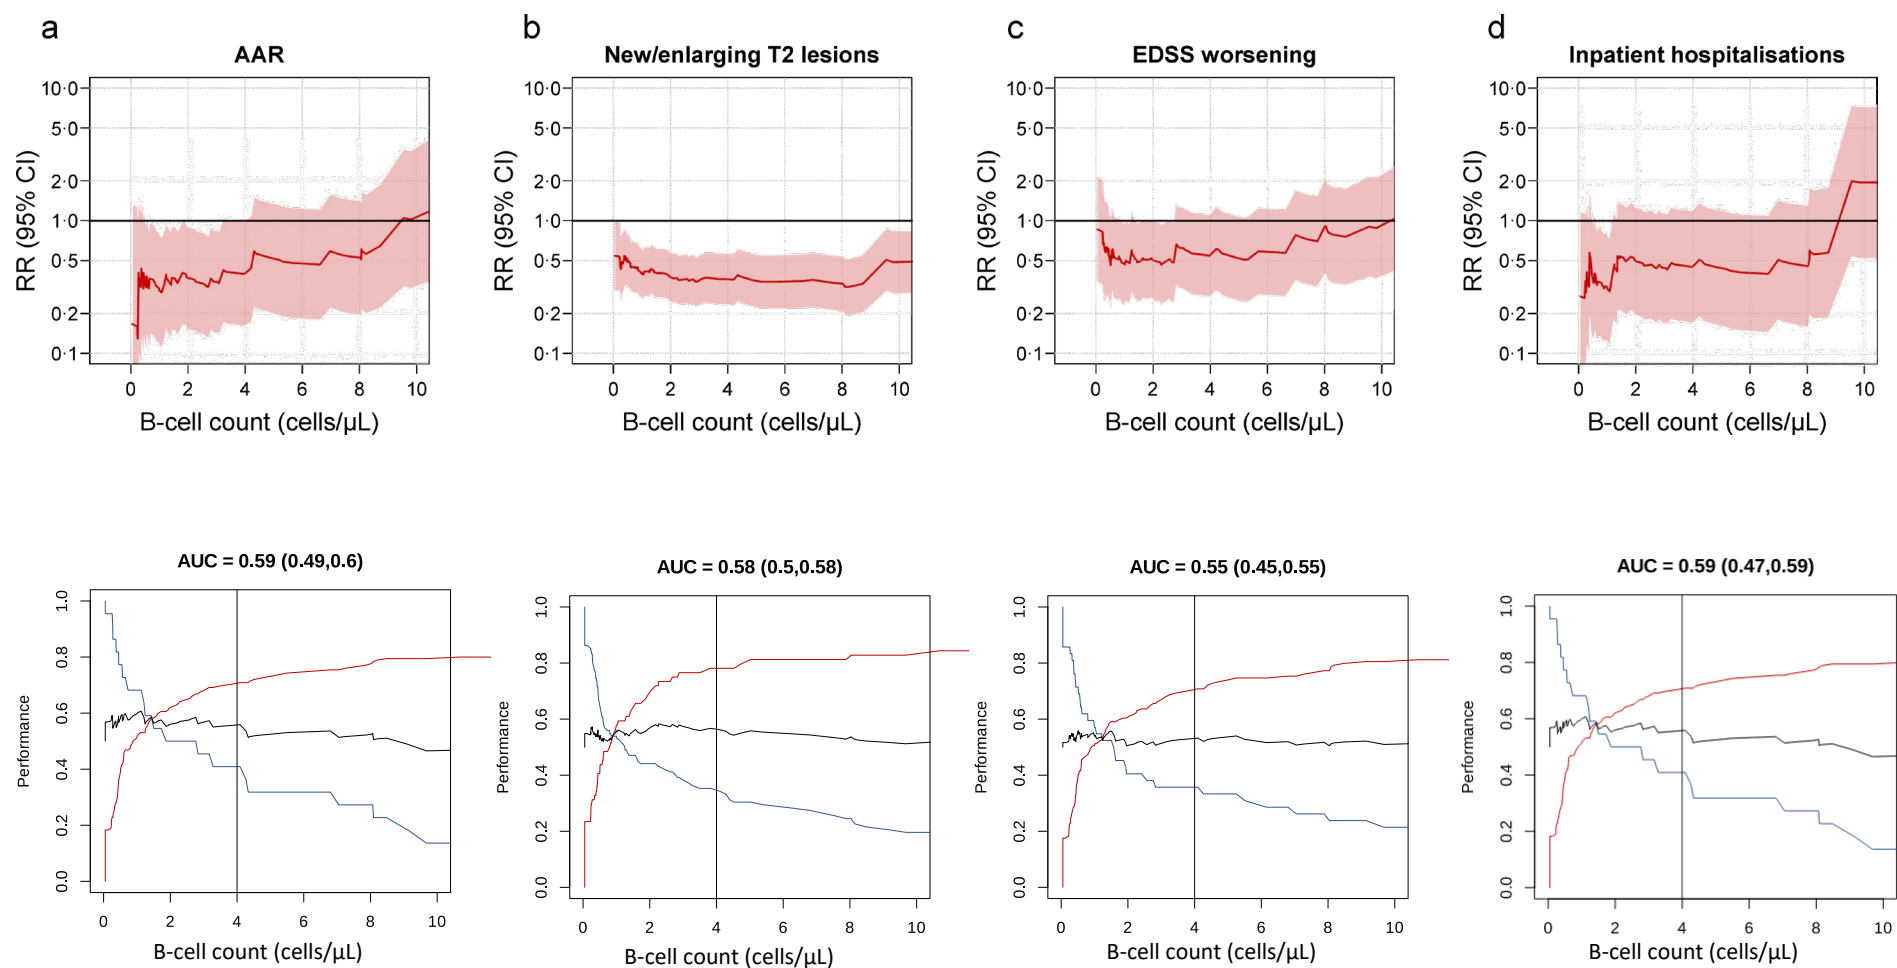

**Supplementary Figure S4. Rate ratios of disease activity based on cut-off points of B-cell level following first dosing interval and sensitivity analyses.** Rate ratio ( $\pm$ 95% CI shaded region) versus W26 B-cell cut-off point and sensitivity analyses of (a) attacks, (b)

new/enlarging T2 lesions, **(c)** EDSS worsening (participants/year), and **(d)** inpatient hospitalisations that occurred after the first dosing period with inebilizumab. Rate ratios were calculated by comparing the rate at which each endpoint occurred in participants below versus above each B-cell cut-off point. Sensitivity analyses for at least one event (blue), specificity for at least one event (red), and mean sensitivity and specificity (grey) as a function of the cut-off;  $\pm 95\%$  CI, calculated through 500 bootstrap replicates using pROC package in R. AAR=Annualised Attack Rate, AUC=Area Under the Curve, CI=Confidence Interval, EDSS=Expanded Disability Status Scale, RR=Rate Ratio, W26=Week 26 After Treatment Initiation.

**a**

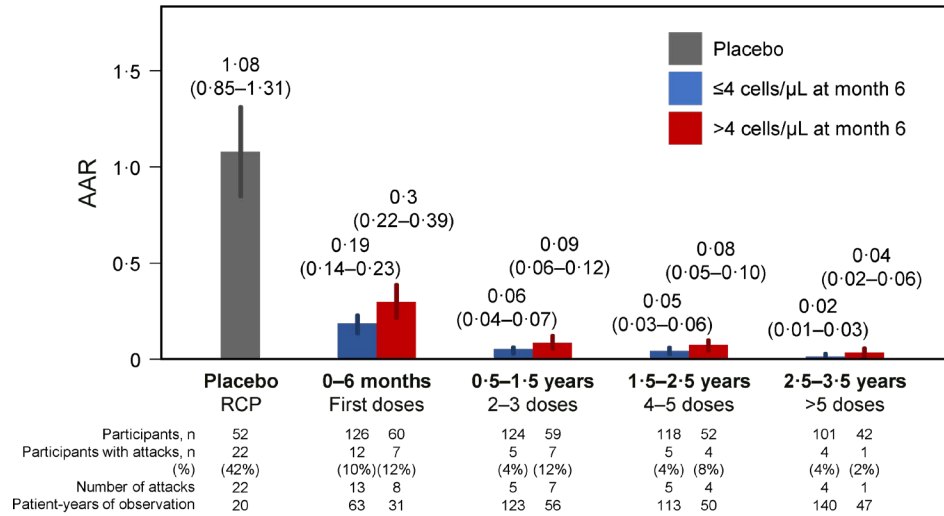

**b**

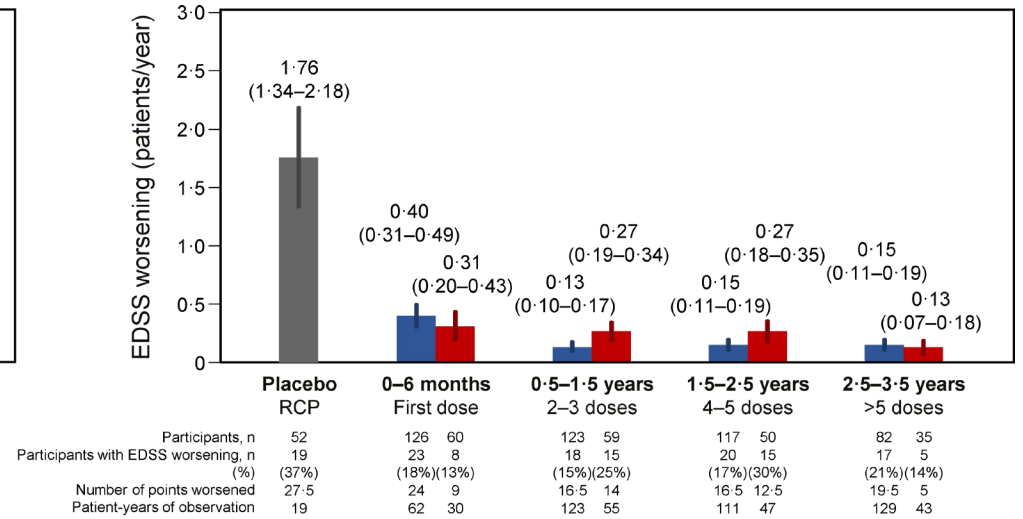

**c**

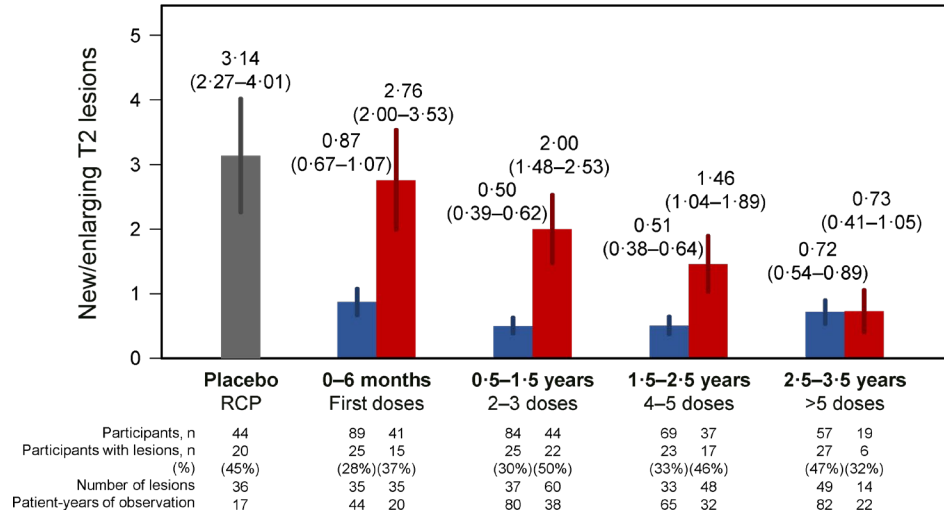

**d**

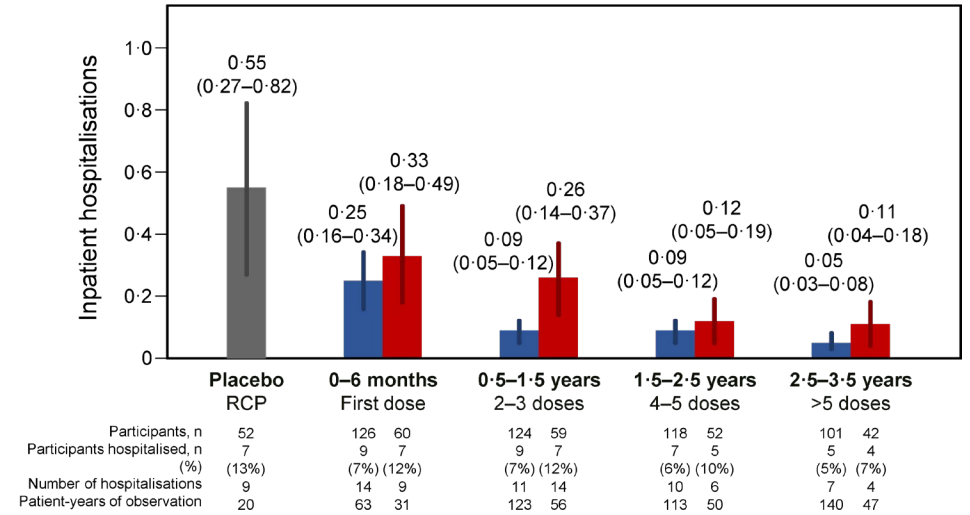

**Supplementary Figure S5. Disease activity outcomes over time with inebilizumab treatment. (a) AAR. (b) Annualised rate of EDSS worsening. (c) Annualised rate of new/enlarging T2 MRI lesions (only participants randomised to inebilizumab are included). (d) Annualised rate of inpatient hospitalisations.** Data split by patients with B-cell counts  $>4$  cells/ $\mu$ L or  $\leq 4$  cells/ $\mu$ L after the first inebilizumab dosing interval (6 months post-treatment) in AQP4-IgG seropositive participants. Plots show rates in placebo-treated participants during the RCP (in grey), then in both participant groups treated with inebilizumab during the first dosing period (first dosing interval), and yearly afterwards (in blue and red). The final bar in each plot displays the combined rate of each endpoint after  $\geq 2.5$  years of continued inebilizumab treatment. Error bars show 95% CI estimated by negative binomial regression. AQP4=Aquaporin-4 Water Channel, CI=Confidence Interval, EDSS=Expanded Disability Status Scale, IgG=Immunoglobulin G, RCP=Randomised Controlled Period.

**a**

**PK over time in B cell subgroups**

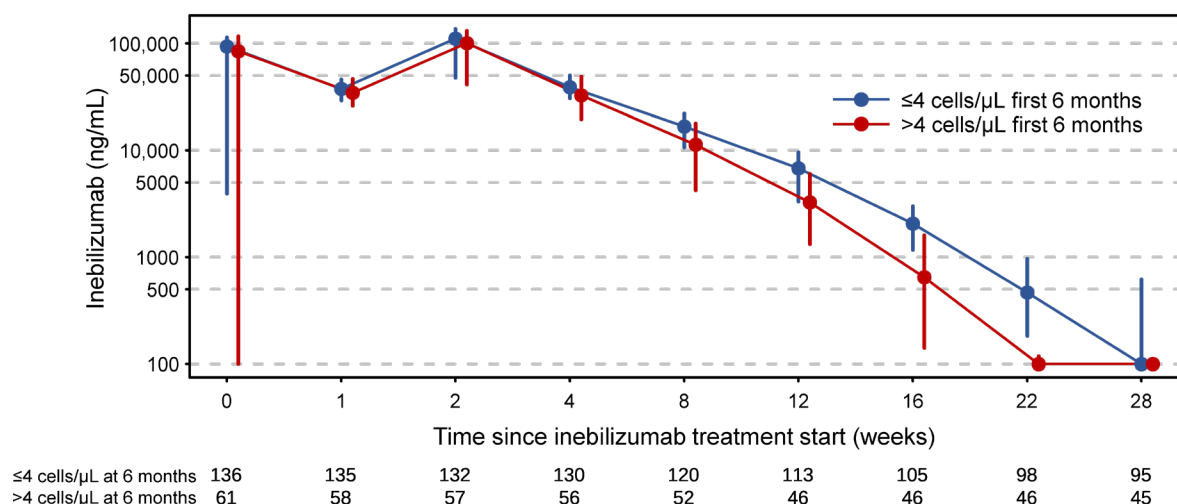

**b**

**W22 PK in B cell subgroups**

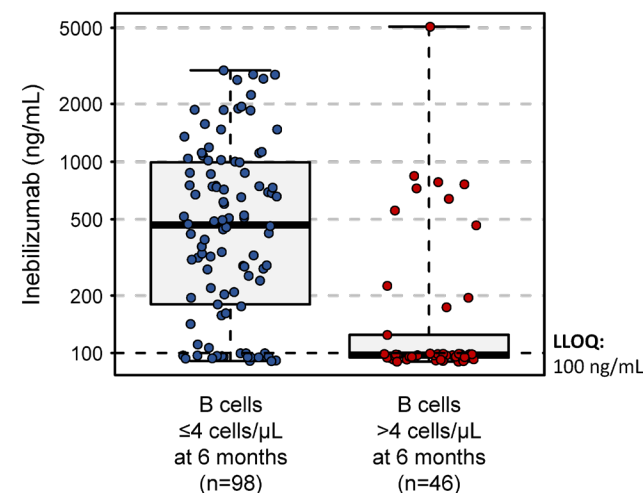

**Supplementary Figure S6. PK of inebilizumab in participants with 6-month B-cell counts >4 cells/μL or ≤4 cells/μL. (a)** Median (IQR) serum inebilizumab concentration in participants with B cells ≤4 cells/μL (blue) or >4 cells/μL (red) during the first dosing interval with inebilizumab. **(b)** Boxplot of serum inebilizumab concentration at week 22 of the RCP. IQR=Interquartile Range, LLOQ=Lower Limit Of Quantification, PK=Pharmacokinetics, RCP=Randomised Controlled Period.

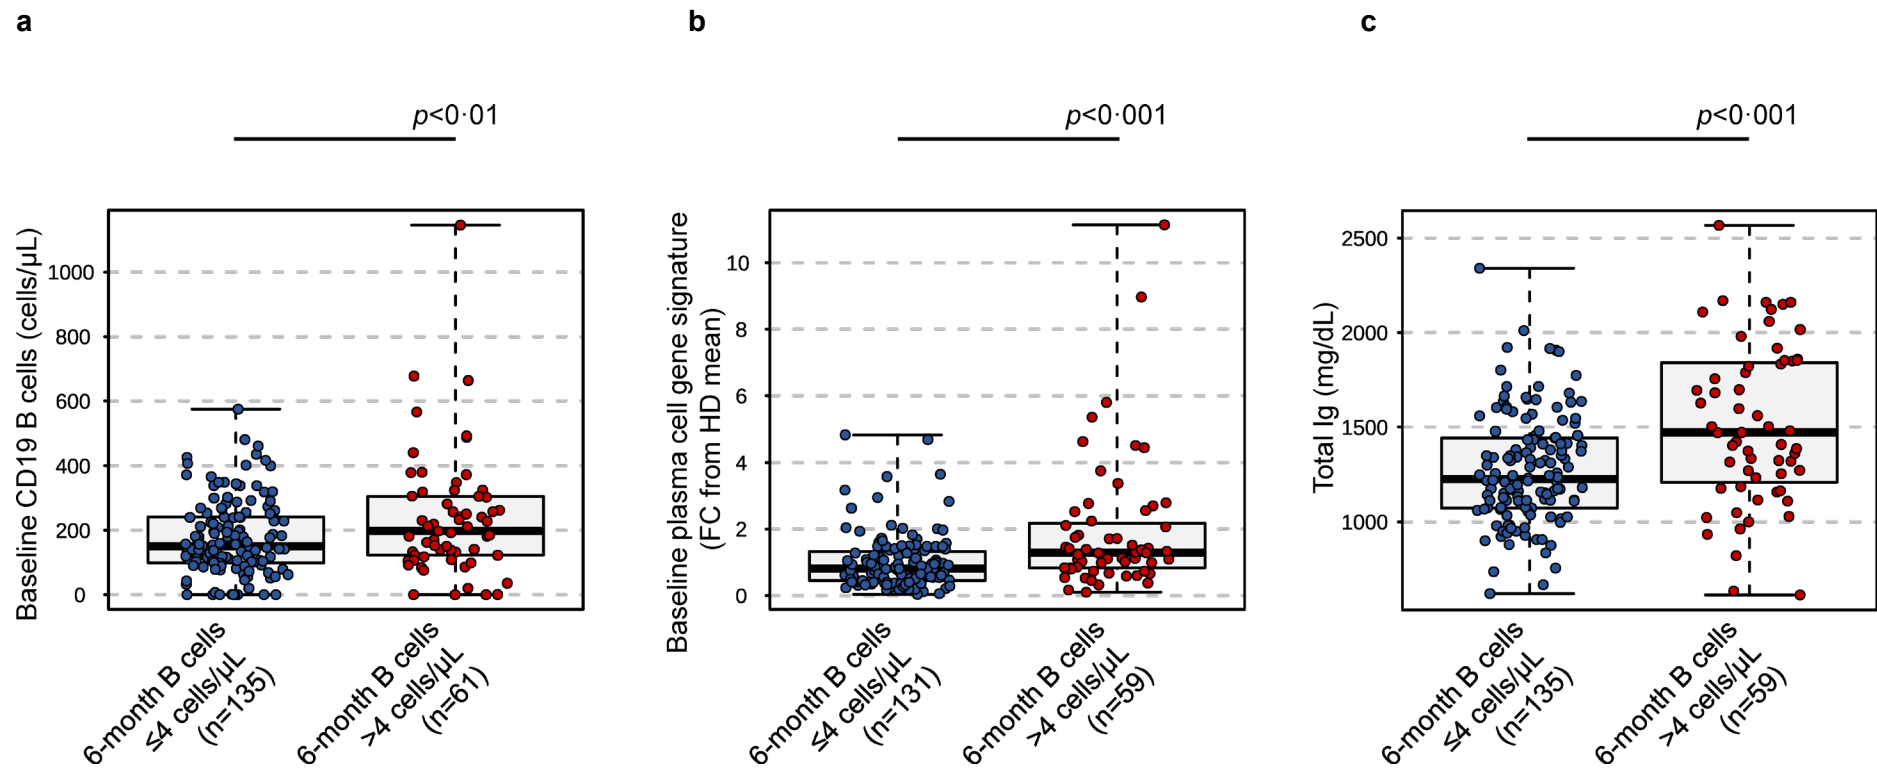

**Supplementary Figure S7. Baseline B-cell count, plasma cell gene signature, and total Ig of participants with  $> 4$  cells/ $\mu$ L or  $\leq 4$  cells/ $\mu$ L after the first dosing period with inebilizumab.** (a) Baseline blood CD19+ B-cell counts, (b) plasma cell gene signature, and (c) total immunoglobulin across the two B-cell depletion subgroups after first dosing period with inebilizumab. Mann–Whitney U test. FC=Fold Change, HD=Healthy Donor, Ig=Immunoglobulin.

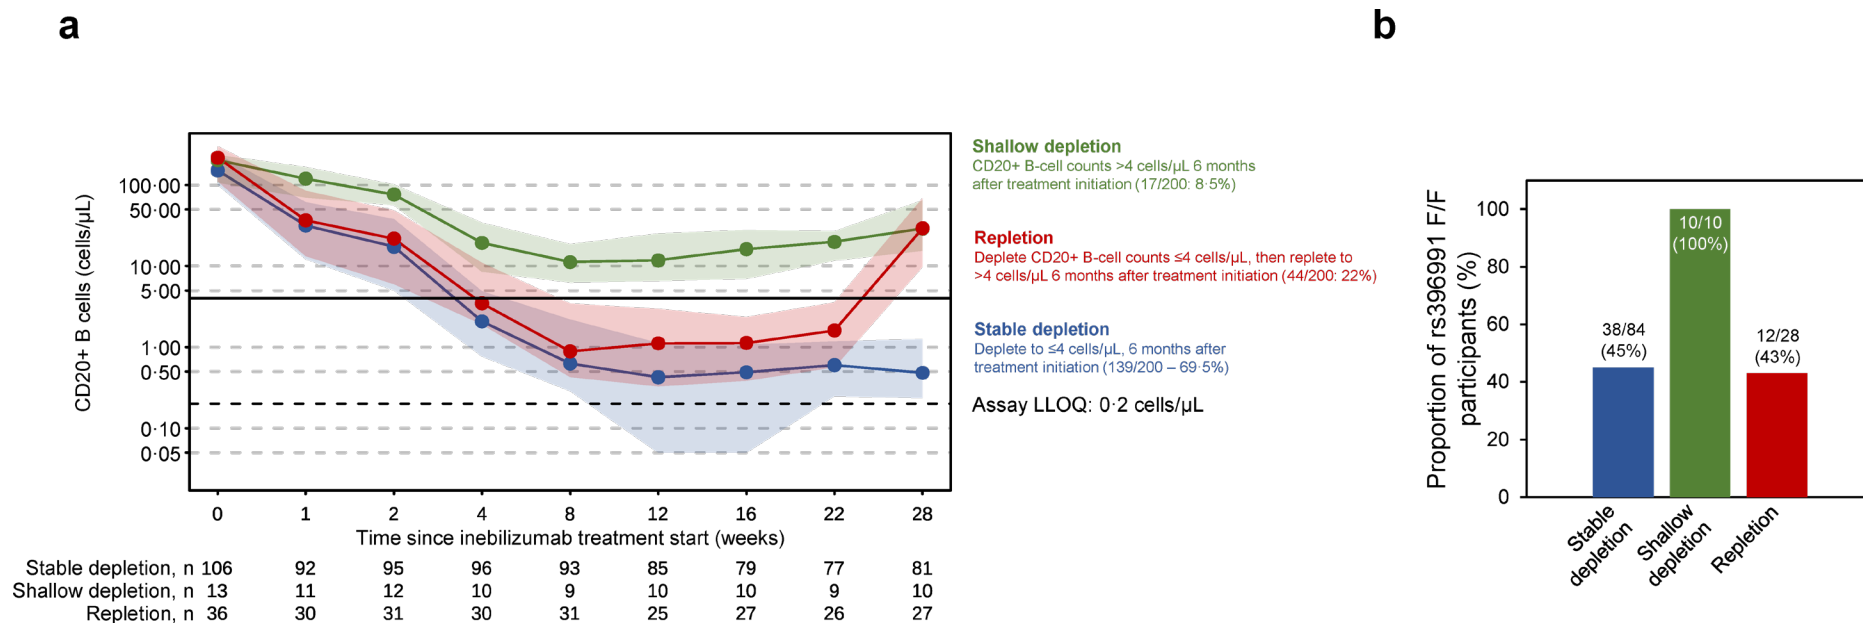

**Supplementary Figure S8. CD20+ B-cell counts grouped according to W28 response and corresponding proportion of rs396991 F/F homozygotes.** (a) Median B-cell counts from the RCP in participants randomised to inebilizumab with B-cell counts ≤4 cells/μL after the first dosing period of inebilizumab treatment (blue), and in those with B-cell counts >4 cells/μL at the end of the first dosing period further subdivided by whether participants displayed depletion ≤4 cells/μL at any point during this interval (red and blue) or whether their B-cell levels stayed >4 cells/μL (green). (b) Bar plot displaying proportion of participants in each subgroup who were rs396991 F/F homozygotes. LLOQ=Lower Limit of Quantification, RCP=Randomised Controlled Period, W28=Week 28 After Treatment Initiation.

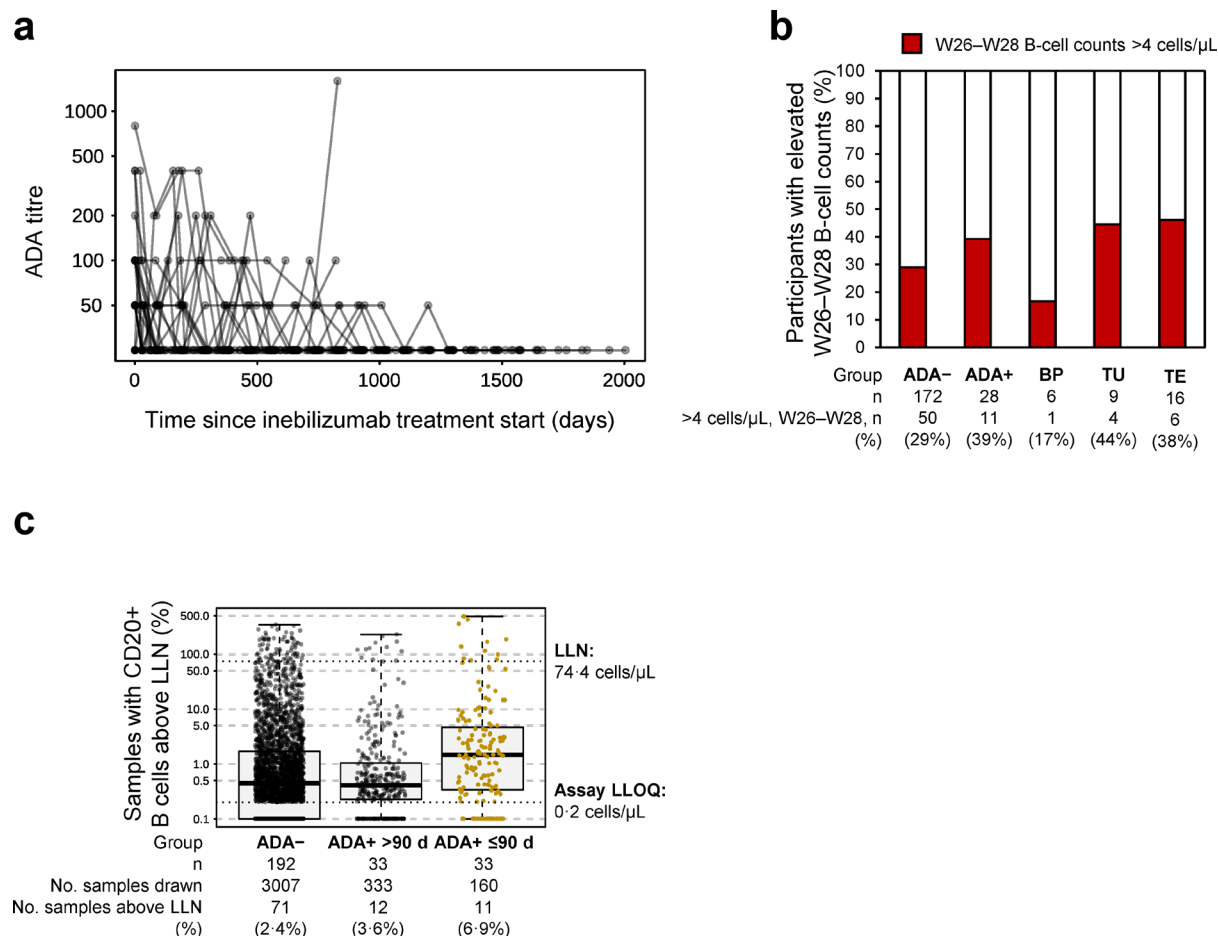

**Supplementary Figure S9. Relationship between CD20+ B-cell counts and ADA.**

(a) Profile plot of ADA titres as a function of time since start of inebilizumab treatment. (b) Chart displaying percentage of participants from different ADA subgroups with B-cell counts >4 cells/μL at W26–W28. (c) Boxplot displaying median B-cell counts in participants who were persistently ADA negative, at intervals >90 days from a positive ADA result in those who intermittently displayed ADA positivity, and at intervals within 90 days of a positive ADA result from these ‘intermittent ADA’ participants.

ADA=Anti-Drug Antibody, BP=Baseline Positive, LLN=Lower Limit Of Normal, LLOQ=Lower Limit Of Quantification, TU=Treatment Unaffected, TE=Treatment Emergent, W26=Week 26 After Treatment Initiation, W28=Week 28 After Treatment Initiation.

## SUPPLEMENTARY TABLES

**Supplementary Table S1: Reagents used for flow cytometry analyses.**

| Reagent | Assay                | Fluor       | Clone | RRID       |
|---------|----------------------|-------------|-------|------------|
| CD45    | CD20+ B cells; PC/PB | APC-h7      | 2D1   | AB_1645479 |
| CD3     | CD20+ B cells        | FITC        | UCHT1 | AB_314059  |
| CD56    | CD20+ B cells        | PerCP-Cy5.5 | HCD56 | AB_893391  |
| CD14    | CD20+ B cells        | FITC        | HCD14 | AB_830676  |
| CD33    | CD20+ B cells        | PerCP-Cy5.5 | WM53  | AB_2074242 |
| CD20    | CD20+ B cells        | APC         | 2H7   | AB_314257  |
| CD3     | PC/PB                | BV510       | UCHT1 | AB_2563467 |
| CD14    | PC/PB                | BV510       | M5E2  | AB_2561379 |
| CD56    | PC/PB                | BV510       | HCD56 | AB_2561385 |
| CD27    | PC/PB                | PE          | O323  | AB_314299  |
| CD38    | PC/PB                | Pe-Cy7      | HB-7  | AB_2562576 |
| HLA-DR  | PC/PB                | APC         | L243  | AB_314687  |

**Supplementary Table S2: List of institutional ethics committees or institutional review boards for N-MOMentum.**

| Region                                                                        | Country              | Site number | Agency type            | Agency                                                                                 |
|-------------------------------------------------------------------------------|----------------------|-------------|------------------------|----------------------------------------------------------------------------------------|
| <b>Central institutional ethics committees or institutional review boards</b> |                      |             |                        |                                                                                        |
| Asia Pacific                                                                  | New Zealand          | –           | Ethics - Central       | Southern Health and Disability Ethics Committee                                        |
| EMEA                                                                          | Bulgaria             | –           | Ethics - Central       | Ethics Committee for Clinical Trials                                                   |
| EMEA                                                                          | Czech Republic       | –           | Ethics - Central/Local | Etická komise Všeobecné fakultní nemocnice v Praze                                     |
| EMEA                                                                          | Estonia              | –           | Ethics - Central       | Research Ethics Committee of the University of Tartu                                   |
| EMEA                                                                          | Germany              | –           | Ethics - Central/Local | Ethikkommission an der medizinischen Fakultät der Heinrich-Heine-Universität           |
| EMEA                                                                          | Greece               | –           | Ethics - Central       | National Ethics Committee                                                              |
| EMEA                                                                          | Hungary              | –           | Ethics - Central       | Egeszsegugyi Tudomanyos Tanacs Klinikai Farmakologiai Etikai Bizottsaga                |
| EMEA                                                                          | Moldova, Republic of | –           | Ethics - Central       | The National Committee for Ethical Review of Clinical Trials                           |
| EMEA                                                                          | Netherlands          | –           | Ethics - Central       | METC Erasmus MC                                                                        |
| EMEA                                                                          | Poland               | –           | Ethics - Central/Local | Komisja Bioetyczna przy Uniwersytecie Medycznym w Lodzi                                |
| EMEA                                                                          | Portugal             | –           | Ethics - Central       | Comissão de Ética para a Investigação Clínica - CEIC                                   |
| EMEA                                                                          | Russian Federation   | –           | Ethics - Central       | The RF MoH, Department of State Regulation of Circulation of Medicines, Ethics Council |
| EMEA                                                                          | Spain                | –           | Ethics - Central/Local | CEIC Hospital Clinico San Carlos                                                       |
| EMEA                                                                          | Turkey               | –           | Ethics - Central       | Istanbul Universitesi Cerrahpasa Tıp Fakultesi Klinik Arastirmalar Etik Kurulu         |
| Latin America                                                                 | Brazil               | –           | Ethics - Central       | Comissao Nacional de Etica em Pesquisa - CONEP                                         |
| North America                                                                 | Canada               | –           | Ethics - Central/Local | Quorum Review IRB                                                                      |

| Region                                                                      | Country   | Site number | Agency type            | Agency                                                                                               |
|-----------------------------------------------------------------------------|-----------|-------------|------------------------|------------------------------------------------------------------------------------------------------|
| North America                                                               | USA       | –           | Ethics - Central/Local | Quorum Review IRB                                                                                    |
| <b>Local institutional ethics committees or institutional review boards</b> |           |             |                        |                                                                                                      |
| Asia Pacific                                                                | Hong Kong | 2000594     | Ethics - Local         | Joint Chinese University of Hong Kong - New Territories East Cluster Clinical Research Ethics Commit |
| Asia Pacific                                                                | Hong Kong | 2000595     | Ethics - Local         | The Unviersity of Hong Kong/ Hospital Authority Hong Kong West Cluster Institutional Review Board    |
| Asia Pacific                                                                | Hong Kong | 2000597     | Ethics - Local         | Kowloon Central Cluster REC / Kowloon East Cluster REC                                               |
| Asia Pacific                                                                | China     | 2003693     | Ethics - Local         | The Third Affiliated Hospital, Sun Yat-Sen University - EC                                           |
| Asia Pacific                                                                | China     | 2003732     | Ethics - Local         | Tianjin Medical University-General Hospital EC office                                                |
| Asia Pacific                                                                | China     | 2003755     | Ethics - Local         | Xuanwu Hospital Capital Medical University EC                                                        |
| Asia Pacific                                                                | India     | 2003588     | Ethics - Local         | Ethics Committee, Sir Ganga Ram Hospital                                                             |
| Asia Pacific                                                                | India     | 2003599     | Ethics - Local         | Central Ethics Committee, Nitte University, University Enclave                                       |
| Asia Pacific                                                                | India     | 2003609     | Ethics - Local         | Institutional Ethics Committee, Amrita Institute of Medical Sciences and Research Centre             |
| Asia Pacific                                                                | India     | 2003731     | Ethics - Local         | Institutional Ethics Committee I, Seth GS Medical College and KEM Hospital                           |
| Asia Pacific                                                                | India     | 2003737     | Ethics - Local         | Institutional Ethics Committee Sree Chitra Tirunal Institute                                         |
| Asia Pacific                                                                | India     | 2003744     | Ethics - Local         | NIMS Institutional Ethics Committee                                                                  |
| Asia Pacific                                                                | Japan     | 2000669     | Ethics - Local         | Kyoto Miniren Hospital Institutional Review Board                                                    |
| Asia Pacific                                                                | Japan     | 2000669     | Ethics - Local         | Kyoto University Hospital Institutional Review Board                                                 |
| Asia Pacific                                                                | Japan     | 2000711     | Ethics - Local         | Tokyo Women's Medical University Hospital Institutional Review Board                                 |

| <b>Region</b> | <b>Country</b>            | <b>Site number</b> | <b>Agency type</b> | <b>Agency</b>                                                                            |
|---------------|---------------------------|--------------------|--------------------|------------------------------------------------------------------------------------------|
| Asia Pacific  | Japan                     | 2000846            | Ethics - Local     | Yamaguchi University Hospital IRB                                                        |
| Asia Pacific  | Japan                     | 2001081            | Ethics - Local     | National University Corporation Tohoku University Tohoku University Hospital IRB         |
| Asia Pacific  | Japan                     | 2001128            | Ethics - Local     | Aomori Prefectural Central Hospital Institutional Review Board                           |
| Asia Pacific  | Japan                     | 2001230            | Ethics - Local     | University of Tsukuba Hospital Institutional Review Board                                |
| Asia Pacific  | Japan                     | 2002885            | Ethics - Local     | Ebara Hospital Institutional Review Board                                                |
| Asia Pacific  | Japan                     | 2003213            | Ethics - Local     | Juntendo University Hospital IRB                                                         |
| Asia Pacific  | Japan                     | 2003552            | Ethics - Local     | National Hospital Organization Hokkaido Medical Center Institutional Review Board        |
| Asia Pacific  | Japan                     | 2003605            | Ethics - Local     | Southern TOHOKU Research Institute for Neuroscience Southern TOHOKU General Hospital IRB |
| Asia Pacific  | Korea, Republic of        | 2000601            | Ethics - Local     | National Cancer Center IRB                                                               |
| Asia Pacific  | Korea, Republic of        | 2000602            | Ethics - Local     | Samsung Medical Center Institutional Review Board                                        |
| Asia Pacific  | Korea, Republic of        | 2000603            | Ethics - Local     | Seoul National University Hospital IRB                                                   |
| Asia Pacific  | Korea, Republic of        | 2000604            | Ethics - Local     | Keimyung University Dongsan Hospital IRB                                                 |
| Asia Pacific  | Korea, Republic of        | 2000605            | Ethics - Local     | Konkuk University Medical Center Institutional Review Board                              |
| Asia Pacific  | Taiwan, Province of China | 2000643            | Ethics - Local     | Institutional Review Board of National Cheng Kung University Hospital                    |
| Asia Pacific  | Taiwan, Province of China | 2000644            | Ethics - Local     | Cheng-Hsin General Hospital Institutional Review Board                                   |
| Asia Pacific  | Taiwan, Province of China | 2000645            | Ethics - Local     | Institutional Review Board, Changhua Christian Hospital                                  |

| <b>Region</b> | <b>Country</b>            | <b>Site number</b> | <b>Agency type</b> | <b>Agency</b>                                                                       |
|---------------|---------------------------|--------------------|--------------------|-------------------------------------------------------------------------------------|
| Asia Pacific  | Taiwan, Province of China | 2000646            | Ethics - Local     | Tzu Chi General Hospital Research Ethics Committee                                  |
| Asia Pacific  | Thailand                  | 2000647            | Ethics - Local     | Office of The Khon Kaen University Ethics Committee in Human Research               |
| Asia Pacific  | Thailand                  | 2000648            | Ethics - Local     | Research Ethics Committee, Faculty of Medicine, Chiang Mai University               |
| Asia Pacific  | Thailand                  | 2000650            | Ethics - Local     | The Institutional Review Board of the Faculty of Medicine, Chulalongkorn University |
| Asia Pacific  | Thailand                  | 2000651            | Ethics - Local     | Siriraj Institutional Review Board                                                  |
| EMEA          | Czech Republic            | 2000585            | Ethics - Local     | Eticka komise Krajska Zdravotni As Nemocnice Teplice Oz                             |
| EMEA          | Israel                    | 2000598            | Ethics - Local     | The Chaim Sheba Medical Center EC                                                   |
| EMEA          | Israel                    | 2000600            | Ethics - Local     | Barzilai Medical Center Local EC                                                    |
| EMEA          | Israel                    | 2002785            | Ethics - Local     | Tel Aviv Sourasky EC                                                                |
| EMEA          | Israel                    | 2002786            | Ethics - Local     | Hadassah University Hospital Local EC                                               |
| EMEA          | Russian Federation        | 2000632            | Ethics - Local     | Ethics Committee at City Clinical Hospital #3                                       |
| EMEA          | Russian Federation        | 2000633            | Ethics - Local     | Ethics Committee at Siberian Regional Medical Centre                                |
| EMEA          | Russian Federation        | 2000634            | Ethics - Local     | Ethics Committee at Republic Clinical Hospital for Rehabilitation Treatment         |
| EMEA          | Russian Federation        | 2000635            | Ethics - Local     | Ethics Committee at Bashkiria State Medical University                              |
| EMEA          | Russian Federation        | 2000636            | Ethics - Local     | Ethics Committee at City Clinical Hospital #31                                      |
| EMEA          | Russian Federation        | 2000639            | Ethics - Local     | Ethics Committee at City Clinical Hospital #11                                      |
| EMEA          | Russian Federation        | 2000640            | Ethics - Local     | Ethics Committee at Omsk State Medical University                                   |
| EMEA          | Russian Federation        | 2003146            | Ethics - Local     | Ethics Committee at Siberian Regional Medical Centre                                |
| EMEA          | Russian Federation        | 2003147            | Ethics - Local     | Ethics Committee at Research Center of Neurology of RAMS                            |

| <b>Region</b> | <b>Country</b>     | <b>Site number</b> | <b>Agency type</b> | <b>Agency</b>                                                                                      |
|---------------|--------------------|--------------------|--------------------|----------------------------------------------------------------------------------------------------|
| EMEA          | Russian Federation | 2003745            | Ethics - Local     | Ethics Committee at Kirov City Hospital # 4                                                        |
| EMEA          | Russian Federation | 2003746            | Ethics - Local     | Ethics Committee at City Clinical Hospital a.n. Buyanov V. M.                                      |
| EMEA          | Serbia             | 2003142            | Ethics - Local     | LEC Clinical Centre Serbia                                                                         |
| EMEA          | Serbia             | 2003144            | Ethics - Local     | LEC Clinical Centre Nis                                                                            |
| EMEA          | Serbia             | 2003145            | Ethics - Local     | LEC General Hospital Uzice                                                                         |
| EMEA          | South Africa       | 2000641            | Ethics - Local     | University of Cape Town, Faculty of Health Sciences Human Research Ethics Committee                |
| EMEA          | South Africa       | 2000642            | Ethics - Local     | University of Stellenbosch, Health Research Ethics Committee                                       |
| EMEA          | Ukraine            | 2003736            | Ethics - Local     | CEQ of Branch Medical Center Cyber Clinic Spizhenko                                                |
| EMEA          | Ukraine            | 1-3PJSOU           | Ethics - Local     | Comission on Ethics Questions of Kyiv City Clinical Hospital #4                                    |
| EMEA          | Ukraine            | 1-GB3UGZ           | Ethics - Local     | Commission on Ethics Questions of Municipal Institution Odesa Regional Clinical Hospital           |
| Latin America | Argentina          | 2000519            | Ethics - Local     | Comité Independiente de Etica en investigación clínica "Dr. Carlos A. Barclay                      |
| Latin America | Argentina          | 2000520            | Ethics - Local     | Comisión Conjunta de Investigación en Salud (CCIS)                                                 |
| Latin America | Argentina          | 2000520            | Ethics - Local     | Comité Institucional de Evaluación de la Facultad de Ciencias Biomédicas de la Universidad Austral |
| Latin America | Brazil             | 2000523            | Ethics - Local     | Comitê de Ética em Pesquisa em Seres Humanos da Universidade de Passo Fundo                        |
| Latin America | Brazil             | 2000524            | Ethics - Local     | Comite de Etica em Pesquisa em do Hospital Moinhos de Vento/RS                                     |
| Latin America | Brazil             | 2000525            | Ethics - Local     | Comitê de Ética em Pesquisa em Seres Humanos da Universidade de Passo Fundo                        |
| Latin America | Brazil             | 2000745            | Ethics - Local     | Comitê de Ética em Pesquisa em Seres Humanos da Universidade Federal de Minas Gerais               |

| <b>Region</b> | <b>Country</b> | <b>Site number</b> | <b>Agency type</b> | <b>Agency</b>                                                                                   |
|---------------|----------------|--------------------|--------------------|-------------------------------------------------------------------------------------------------|
| Latin America | Colombia       | 2000533            | Ethics - Local     | Comite de Etica en Investigacion Colegio Mayor de Nuestra Senora del Rosario                    |
| Latin America | Colombia       | 2000537            | Ethics - Local     | Comite de Etica e Investigacion Clinica de la Fundacion Cardioinfantil                          |
| Latin America | Mexico         | 2000606            | Ethics - Local     | Comité de Etica en Investigacion de Medica Sur Sociedad Anónima Bursátil de Capital Variable    |
| Latin America | Mexico         | 2000607            | Ethics - Local     | Comite de Etica en Investigacion del Grupo Medico Camino SC                                     |
| Latin America | Mexico         | 2000608            | Ethics - Local     | Comité de Ética en Investigación de Christus Muguerza del Parque S.A. de C.V.                   |
| Latin America | Mexico         | 2000609            | Ethics - Local     | Comite Institucional de Etica CRI y Comite Institucional de Investigacion CRI                   |
| Latin America | Mexico         | 2000610            | Ethics - Local     | Comite de ética del Antiguo Hospital Civil de Guadalajara Fray Antonio Alcalde                  |
| Latin America | Mexico         | 2000611            | Ethics - Local     | Comite de Etica en Investigacion del Hospital Central Doctor Ignacio Morones Prieto             |
| Latin America | Mexico         | 2000612            | Ethics - Local     | Comite de Etica en Investigacion Winsett Rethman SA de CV                                       |
| Latin America | Mexico         | 2000613            | Ethics - Local     | Comite de Etica de la Facultad de Medicina de la UANL y Hosp. Univ. Dr. Jose Eleuterio González |
| Latin America | Peru           | 2000618            | Ethics - Local     | Comite de Bioetica de la Red Asistencial Sabogal - EsSalud                                      |
| Latin America | Peru           | 2000621            | Ethics - Local     | Comite Institucional de Etica en la Investigacion del Hospital Nacional Cayetano Heredia        |
| Latin America | Peru           | 2000622            | Ethics - Local     | Comité de Etica en Investigación - Arequipa                                                     |
| North America | Canada         | 2000517            | Ethics - Local     | McGill University Health Center Montreal Hospital                                               |
| North America | Canada         | 2000518            | Ethics - Local     | Ottawa Hospital Research Ethics Board                                                           |

| <b>Region</b> | <b>Country</b> | <b>Site number</b> | <b>Agency type</b> | <b>Agency</b>                                                                       |
|---------------|----------------|--------------------|--------------------|-------------------------------------------------------------------------------------|
| North America | Canada         | 2000662            | Ethics - Local     | UBC Clinical Research Ethics Board                                                  |
| North America | USA            | 2000491            | Ethics - Local     | Henry Ford Health System Institutional Review Board                                 |
| North America | USA            | 2000492            | Ethics - Local     | Johns Hopkins Medicine Office of Human Subjects Research Institutional Review Board |
| North America | USA            | 2000493            | Ethics - Local     | University of Chicago Hospitals Institutional Review Board                          |
| North America | USA            | 2000494            | Ethics - Local     | University of Maryland Human Research Protections Office                            |
| North America | USA            | 2000495            | Ethics - Local     | UT Southwestern IRB                                                                 |
| North America | USA            | 2000496            | Ethics - Local     | UCSF Human Research Protection Program                                              |
| North America | USA            | 2000498            | Ethics - Local     | Wayne State University IRB                                                          |
| North America | USA            | 2000501            | Ethics - Local     | Baylor College of Medicine IRB                                                      |
| North America | USA            | 2000502            | Ethics - Local     | Missouri Baptist Medical Center Institutional Review Board                          |
| North America | USA            | 2000509            | Ethics - Local     | UCDHS IRB                                                                           |
| North America | USA            | 2000510            | Ethics - Local     | Kansas City Veterans Administration Medical Center                                  |
| North America | USA            | 2000511            | Ethics - Local     | Vanderbilt Institutional Review Board                                               |
| North America | USA            | 2000513            | Ethics - Local     | LSU-HSC-S IRB                                                                       |
| North America | USA            | 2000514            | Ethics - Local     | Weill Cornell Medical College Institutional Review Board                            |
| North America | USA            | 2000515            | Ethics - Local     | Cleveland Clinic Institutional Review Board                                         |
| North America | USA            | 2000516            | Ethics - Local     | University of Texas MD Anderson Cancer Center Institutional Review Board            |

| <b>Region</b> | <b>Country</b>     | <b>Site number</b> | <b>Agency type</b> | <b>Agency</b>                                                                            |
|---------------|--------------------|--------------------|--------------------|------------------------------------------------------------------------------------------|
| North America | USA                | 2003421            | Ethics - Local     | University of California Irvine Institutional Review Board                               |
| North America | USA                | 2003451            | Ethics - Local     | Mayo Clinic Institutional Review Board                                                   |
| North America | USA                | 2003524            | Ethics - Local     | University of Pennsylvania Institutional Review Board                                    |
| North America | USA                | 2003601            | Ethics - Local     | SUNY Buffalo                                                                             |
| Asia Pacific  | Japan              | 2000669            | Ethics - Local     | Kyoto University Hospital Institutional Review Board                                     |
| Asia Pacific  | Japan              | 2000711            | Ethics - Local     | Tokyo Women's Medical University Hospital Institutional Review Board                     |
| Asia Pacific  | Japan              | 2000846            | Ethics - Local     | Yamaguchi University Hospital IRB                                                        |
| Asia Pacific  | Japan              | 2001081            | Ethics - Local     | National University Corporation Tohoku University Tohoku University Hospital IRB         |
| Asia Pacific  | Japan              | 2001128            | Ethics - Local     | Aomori Prefectural Central Hospital Institutional Review Board                           |
| Asia Pacific  | Japan              | 2001230            | Ethics - Local     | University of Tsukuba Hospital Institutional Review Board                                |
| Asia Pacific  | Japan              | 2002885            | Ethics - Local     | Ebara Hospital Institutional Review Board                                                |
| Asia Pacific  | Japan              | 2003213            | Ethics - Local     | Juntendo University Hospital IRB                                                         |
| Asia Pacific  | Japan              | 2003552            | Ethics - Local     | National Hospital Organization Hokkaido Medical Center Institutional Review Board        |
| Asia Pacific  | Japan              | 2003605            | Ethics - Local     | Southern TOHOKU Research Institute for Neuroscience Southern TOHOKU General Hospital IRB |
| Asia Pacific  | Korea, Republic of | 2000601            | Ethics - Local     | National Cancer Center IRB                                                               |
| Asia Pacific  | Korea, Republic of | 2000602            | Ethics - Local     | Samsung Medical Center Institutional Review Board                                        |
| Asia Pacific  | Korea, Republic of | 2000603            | Ethics - Local     | Seoul National University Hospital IRB                                                   |

| <b>Region</b> | <b>Country</b>            | <b>Site number</b> | <b>Agency type</b> | <b>Agency</b>                                                                       |
|---------------|---------------------------|--------------------|--------------------|-------------------------------------------------------------------------------------|
| Asia Pacific  | Korea, Republic of        | 2000604            | Ethics - Local     | Keimyung University Dongsan Hospital IRB                                            |
| Asia Pacific  | Korea, Republic of        | 2000605            | Ethics - Local     | Konkuk University Medical Center Institutional Review Board                         |
| Asia Pacific  | Taiwan, Province of China | 2000643            | Ethics - Local     | Institutional Review Board of National Cheng Kung University Hospital               |
| Asia Pacific  | Taiwan, Province of China | 2000644            | Ethics - Local     | Cheng-Hsin General Hospital Institutional Review Board                              |
| Asia Pacific  | Taiwan, Province of China | 2000645            | Ethics - Local     | Institutional Review Board, Changhua Christian Hospital                             |
| Asia Pacific  | Taiwan, Province of China | 2000646            | Ethics - Local     | Tzu Chi General Hospital Research Ethics Committee                                  |
| Asia Pacific  | Thailand                  | 2000647            | Ethics - Local     | Office of The Khon Kaen University Ethics Committee in Human Research               |
| Asia Pacific  | Thailand                  | 2000648            | Ethics - Local     | Research Ethics Committee, Faculty of Medicine, Chiang Mai University               |
| Asia Pacific  | Thailand                  | 2000650            | Ethics - Local     | The Institutional Review Board of the Faculty of Medicine, Chulalongkorn University |
| Asia Pacific  | Thailand                  | 2000651            | Ethics - Local     | Siriraj Institutional Review Board                                                  |
| EMEA          | Czech Republic            | 2000585            | Ethics - Local     | Eticka komise Krajska Zdravotni As Nemocnice Teplice Oz                             |
| EMEA          | Israel                    | 2000598            | Ethics - Local     | The Chaim Sheba Medical Center EC                                                   |
| EMEA          | Israel                    | 2000600            | Ethics - Local     | Barzilai Medical Center Local EC                                                    |
| EMEA          | Israel                    | 2002785            | Ethics - Local     | Tel Aviv Sourasky EC                                                                |
| EMEA          | Israel                    | 2002786            | Ethics - Local     | Hadassah University Hospital Local EC                                               |
| EMEA          | Russian Federation        | 2000632            | Ethics - Local     | Ethics Committee at City Clinical Hospital #3                                       |
| EMEA          | Russian Federation        | 2000633            | Ethics - Local     | Ethics Committee at Siberian Regional Medical Centre                                |
| EMEA          | Russian Federation        | 2000634            | Ethics - Local     | Ethics Committee at Republic Clinical Hospital for Rehabilitation Treatment         |

| <b>Region</b> | <b>Country</b>     | <b>Site number</b> | <b>Agency type</b> | <b>Agency</b>                                                                            |
|---------------|--------------------|--------------------|--------------------|------------------------------------------------------------------------------------------|
| EMEA          | Russian Federation | 2000635            | Ethics - Local     | Ethics Committee at Bashkiria State Medical University                                   |
| EMEA          | Russian Federation | 2000636            | Ethics - Local     | Ethics Committee at City Clinical Hospital #31                                           |
| EMEA          | Russian Federation | 2000639            | Ethics - Local     | Ethics Committee at City Clinical Hospital #11                                           |
| EMEA          | Russian Federation | 2000640            | Ethics - Local     | Ethics Committee at Omsk State Medical University                                        |
| EMEA          | Russian Federation | 2003146            | Ethics - Local     | Ethics Committee at Siberian Regional Medical Centre                                     |
| EMEA          | Russian Federation | 2003147            | Ethics - Local     | Ethics Committee at Research Center of Neurology of RAMS                                 |
| EMEA          | Russian Federation | 2003745            | Ethics - Local     | Ethics Committee at Kirov City Hospital # 4                                              |
| EMEA          | Russian Federation | 2003746            | Ethics - Local     | Ethics Committee at City Clinical Hospital a.n. Buyanov V. M.                            |
| EMEA          | Serbia             | 2003142            | Ethics - Local     | LEC Clinical Centre Serbia                                                               |
| EMEA          | Serbia             | 2003144            | Ethics - Local     | LEC Clinical Centre Nis                                                                  |
| EMEA          | Serbia             | 2003145            | Ethics - Local     | LEC General Hospital Uzice                                                               |
| EMEA          | South Africa       | 2000641            | Ethics - Local     | University of Cape Town, Faculty of Health Sciences Human Research Ethics Committee      |
| EMEA          | South Africa       | 2000642            | Ethics - Local     | University of Stellenbosch, Health Research Ethics Committee                             |
| EMEA          | Ukraine            | 2003736            | Ethics - Local     | CEQ of Branch Medical Center Cyber Clinic Spizhenko                                      |
| EMEA          | Ukraine            | 1-3PJSOU           | Ethics - Local     | Comission on Ethics Questions of Kyiv City Clinical Hospital #4                          |
| EMEA          | Ukraine            | 1-GB3UGZ           | Ethics - Local     | Commission on Ethics Questions of Municipal Institution Odesa Regional Clinical Hospital |
| Latin America | Argentina          | 2000519            | Ethics - Local     | Comité Independiente de Etica en investigación clínica "Dr. Carlos A. Barclay            |
| Latin America | Argentina          | 2000520            | Ethics - Local     | Comisión Conjunta de Investigación en Salud (CCIS)                                       |

| <b>Region</b> | <b>Country</b> | <b>Site number</b> | <b>Agency type</b> | <b>Agency</b>                                                                                      |
|---------------|----------------|--------------------|--------------------|----------------------------------------------------------------------------------------------------|
| Latin America | Argentina      | 2000520            | Ethics - Local     | Comité Institucional de Evaluación de la Facultad de Ciencias Biomédicas de la Universidad Austral |
| Latin America | Brazil         | 2000523            | Ethics - Local     | Comitê de Ética em Pesquisa em Seres Humanos da Universidade de Passo Fundo                        |
| Latin America | Brazil         | 2000524            | Ethics - Local     | Comite de Etica em Pesquisa em do Hospital Moinhos de Vento/RS                                     |
| Latin America | Brazil         | 2000525            | Ethics - Local     | Comitê de Ética em Pesquisa em Seres Humanos da Universidade de Passo Fundo                        |
| Latin America | Brazil         | 2000745            | Ethics - Local     | Comitê de Ética em Pesquisa em Seres Humanos da Universidade Federal de Minas Gerais               |
| Latin America | Colombia       | 2000533            | Ethics - Local     | Comite de Etica en Investigacion Colegio Mayor de Nuestra Senora del Rosario                       |
| Latin America | Colombia       | 2000537            | Ethics - Local     | Comite de Etica e Investigacion Clinica de la Fundacion Cardioinfantil                             |
| Latin America | Mexico         | 2000606            | Ethics - Local     | Comité de Etica en Investigacion de Medica Sur Sociedad Anónima Bursátil de Capital Variable       |
| Latin America | Mexico         | 2000607            | Ethics - Local     | Comite de Etica en Investigacion del Grupo Medico Camino SC                                        |
| Latin America | Mexico         | 2000608            | Ethics - Local     | Comité de Ética en Investigación de Christus Muguerza del Parque S.A. de C.V.                      |
| Latin America | Mexico         | 2000609            | Ethics - Local     | Comite Institucional de Etica CRI y Comite Institucional de Investigacion CRI                      |
| Latin America | Mexico         | 2000610            | Ethics - Local     | Comite de ética del Antiguo Hospital Civil de Guadalajara Fray Antonio Alcalde                     |
| Latin America | Mexico         | 2000611            | Ethics - Local     | Comite de Etica en Investigacion del Hospital Central Doctor Ignacio Morones Prieto                |
| Latin America | Mexico         | 2000612            | Ethics - Local     | Comite de Etica en Investigacion Winsett Rethman SA de CV                                          |

| <b>Region</b> | <b>Country</b> | <b>Site number</b> | <b>Agency type</b> | <b>Agency</b>                                                                                   |
|---------------|----------------|--------------------|--------------------|-------------------------------------------------------------------------------------------------|
| Latin America | Mexico         | 2000613            | Ethics - Local     | Comite de Etica de la Facultad de Medicina de la UANL y Hosp. Univ. Dr. Jose Eleuterio González |
| Latin America | Peru           | 2000618            | Ethics - Local     | Comite de Bioetica de la Red Asistencial Sabogal - EsSalud                                      |
| Latin America | Peru           | 2000621            | Ethics - Local     | Comite Institucional de Etica en la Investigacion del Hospital Nacional Cayetano Heredia        |
| Latin America | Peru           | 2000622            | Ethics - Local     | Comité de Etica en Investigación - Arequipa                                                     |
| North America | Canada         | 2000517            | Ethics - Local     | McGill University Health Center Montreal Hospital                                               |
| North America | Canada         | 2000518            | Ethics - Local     | Ottawa Hospital Research Ethics Board                                                           |
| North America | Canada         | 2000662            | Ethics - Local     | UBC Clinical Research Ethics Board                                                              |
| North America | USA            | 2000491            | Ethics - Local     | Henry Ford Health System Institutional Review Board                                             |
| North America | USA            | 2000492            | Ethics - Local     | Johns Hopkins Medicine Office of Human Subjects Research Institutional Review Board             |
| North America | USA            | 2000493            | Ethics - Local     | University of Chicago Hospitals Institutional Review Board                                      |
| North America | USA            | 2000494            | Ethics - Local     | University of Maryland Human Research Protections Office                                        |
| North America | USA            | 2000495            | Ethics - Local     | UT Southwestern IRB                                                                             |
| North America | USA            | 2000496            | Ethics - Local     | UCSF Human Research Protection Program                                                          |
| North America | USA            | 2000498            | Ethics - Local     | Wayne State University IRB                                                                      |
| North America | USA            | 2000501            | Ethics - Local     | Baylor College of Medicine IRB                                                                  |
| North America | USA            | 2000502            | Ethics - Local     | Missouri Baptist Medical Center Institutional Review Board                                      |
| North America | USA            | 2000509            | Ethics - Local     | UCDHS IRB                                                                                       |

| <b>Region</b> | <b>Country</b> | <b>Site number</b> | <b>Agency type</b> | <b>Agency</b>                                                            |
|---------------|----------------|--------------------|--------------------|--------------------------------------------------------------------------|
| North America | USA            | 2000510            | Ethics - Local     | Kansas City Veterans Administration Medical Center                       |
| North America | USA            | 2000511            | Ethics - Local     | Vanderbilt Institutional Review Board                                    |
| North America | USA            | 2000513            | Ethics - Local     | LSU-HSC-S IRB                                                            |
| North America | USA            | 2000514            | Ethics - Local     | Weill Cornell Medical College Institutional Review Board                 |
| North America | USA            | 2000515            | Ethics - Local     | Cleveland Clinic Institutional Review Board                              |
| North America | USA            | 2000516            | Ethics - Local     | University of Texas MD Anderson Cancer Center Institutional Review Board |
| North America | USA            | 2003421            | Ethics - Local     | University of California Irvine Institutional Review Board               |
| North America | USA            | 2003451            | Ethics - Local     | Mayo Clinic Institutional Review Board                                   |
| North America | USA            | 2003524            | Ethics - Local     | University of Pennsylvania Institutional Review Board                    |
| North America | USA            | 2003601            | Ethics - Local     | SUNY Buffalo                                                             |



**Supplementary Table S3: Kinetics of B-cell and immunoglobulin depletion during the study.**

| Group                                  | Start of RCP | End of RCP | OLP W26 | OLP W52 | OLP W78 | OLP W104 | OLP W130 | OLP W156 |
|----------------------------------------|--------------|------------|---------|---------|---------|----------|----------|----------|
| Total CD20+ B cells, cells/μL          |              |            |         |         |         |          |          |          |
| RCP placebo                            | 157.48       | 171.41     | 0.55    | 0.58    | 0.44    | 0.45     | 0.30     | 0.28     |
| 1Q                                     | 101.35       | 118.40     | 0.20    | 0.1     | 0.15    | 0.27     | 0.1      | 0.1      |
| 3Q                                     | 232.17       | 255.19     | 3.97    | 4.93    | 3.27    | 2.67     | 1.45     | 0.43     |
| RCP inebilizumab                       | 184.02       | 1.26       | 0.83    | 0.70    | 0.59    | 0.52     | 0.39     | 0.33     |
| 1Q                                     | 107.88       | 0.42       | 0.32    | 0.24    | 0.1     | 0.21     | 0.21     | 0.10     |
| 3Q                                     | 280.22       | 6.22       | 4.35    | 3.55    | 4.07    | 1.62     | 1.18     | 1.08     |
| p value                                | 0.298        | 1.87e-27   | 0.229   | 0.515   | 0.861   | 1.00     | 0.831    | 0.380    |
| Plasma cell signature, FC from HD mean |              |            |         |         |         |          |          |          |
| RCP placebo                            | 1.06         | 1.37       | 0.04    |         |         |          |          |          |
| 1Q                                     | 0.59         | 0.64       | 0.02    |         |         |          |          |          |
| 3Q                                     | 1.52         | 2.05       | 0.08    |         |         |          |          |          |
| RCP inebilizumab                       | 0.93         | 0.05       | 0.06    |         |         |          |          |          |
| 1Q                                     | 0.52         | 0.03       | 0.03    |         |         |          |          |          |
| 3Q                                     | 1.41         | 0.21       | 0.33    |         |         |          |          |          |
| p value                                | 0.339        | 2.95e-22   | 0.011   |         |         |          |          |          |
| Total immunoglobulin, mg/dL            |              |            |         |         |         |          |          |          |
| RCP placebo                            | 1369         | 1380.5     | 1181    | 1106    | 1060.5  | 1043     | 986.5    | 913      |
| 1Q                                     | 1066.25      | 1198.5     | 1001    | 828.5   | 871.75  | 822.5    | 735      | 707.5    |
| 3Q                                     | 1626.75      | 1651.75    | 1406    | 1373.5  | 1256.5  | 1246     | 1191.5   | 1060     |
| RCP inebilizumab                       | 1305.5       | 1182.5     | 1123    | 1056.5  | 1015    | 997      | 946.5    | 936      |
| 1Q                                     | 1112.75      | 1020.25    | 926     | 898     | 815     | 825      | 785      | 732.5    |
| 3Q                                     | 1584.5       | 1436.5     | 1361    | 1290.5  | 1262    | 1229     | 1258.5   | 1180     |
| p value                                | 0.498        | 2.09e-04   | 0.562   | 0.635   | 0.723   | 0.828    | 0.782    | 0.707    |
| Immunoglobulin G, mg/dL                |              |            |         |         |         |          |          |          |
| RCP placebo                            | 1060         | 1035       | 919     | 901     | 889     | 844      | 822.5    | 743      |
| 1Q                                     | 828          | 889.25     | 733     | 678     | 679.25  | 647.5    | 607.75   | 581.5    |
| 3Q                                     | 1190         | 1250       | 1110    | 1035    | 1015    | 1020     | 931.25   | 904.5    |

|                                |        |           |        |        |        |       |        |        |
|--------------------------------|--------|-----------|--------|--------|--------|-------|--------|--------|
| RCP inebilizumab               | 981    | 922·5     | 895    | 862    | 845    | 815   | 793·5  | 781    |
| 1Q                             | 840·25 | 813·75    | 759·25 | 738·25 | 683    | 666   | 654·25 | 617·25 |
| 3Q                             | 1212·5 | 1142·5    | 1105   | 1035   | 1030   | 1020  | 1007·5 | 987    |
| p value                        | 0·551  | 0·017     | 0·996  | 0·998  | 0·890  | 0·987 | 0·651  | 0·441  |
| <b>Immunoglobulin M, mg/dL</b> |        |           |        |        |        |       |        |        |
| RCP placebo                    | 100    | 103       | 64     | 56     | 50·5   | 53    | 44·5   | 44     |
| 1Q                             | 62·5   | 70·75     | 35     | 29·5   | 28     | 29    | 30·5   | 30·5   |
| 3Q                             | 136·5  | 152·25    | 108    | 89     | 77·5   | 77    | 67·25  | 66·5   |
| RCP inebilizumab               | 86·5   | 63        | 55     | 49·5   | 47     | 44    | 40·5   | 39     |
| 1Q                             | 58·5   | 38        | 32·75  | 27·75  | 26     | 26    | 25     | 24     |
| 3Q                             | 142    | 99·5      | 87     | 78     | 76     | 77    | 74     | 67·75  |
| p value                        | 0·703  | 9·365e-06 | 0·220  | 0·468  | 0·789  | 0·444 | 0·880  | 0·590  |
| <b>Immunoglobulin A, mg/dL</b> |        |           |        |        |        |       |        |        |
| RCP placebo                    | 221    | 224·5     | 167    | 134    | 128·5  | 127   | 105·5  | 96     |
| 1Q                             | 168·5  | 161·5     | 102    | 95·5   | 89·25  | 80    | 77·25  | 78·5   |
| 3Q                             | 276·5  | 268       | 219    | 190    | 165·25 | 155·5 | 141·5  | 129·5  |
| RCP inebilizumab               | 190    | 150·5     | 127·5  | 110·5  | 104    | 103   | 91     | 84·5   |
| 1Q                             | 128    | 106       | 92·75  | 86     | 79     | 74    | 66·25  | 65     |
| 3Q                             | 241    | 218       | 197·25 | 173    | 152    | 148   | 140·5  | 132·75 |
| p value                        | 0·027  | 2·095e-05 | 0·062  | 0·068  | 0·135  | 0·231 | 0·341  | 0·346  |
| <b>Immunoglobulin E, mg/dL</b> |        |           |        |        |        |       |        |        |
| RCP placebo                    | 16·1   | 18·8      | 9·2    | 6·6    | 4·75   | 5·6   | 3·8    | 2·8    |
| 1Q                             | 5·8    | 5·4       | 3·8    | 2·2    | 1·4625 | 0·75  | 0·75   | 0·75   |
| 3Q                             | 40·8   | 52·025    | 26·4   | 18·2   | 16·7   | 13·05 | 6·325  | 6·9    |
| RCP inebilizumab               | 14·6   | 8·6       | 5·5    | 4·8    | 3·9    | 4     | 3·9    | 3·2    |
| 1Q                             | 4·4    | 3·25      | 1·9    | 0·75   | 0·75   | 0·75  | 0·75   | 0·75   |
| 3Q                             | 54·675 | 32·25     | 19·35  | 17·9   | 15·35  | 18·1  | 15·925 | 14·85  |
| p value                        | 0·753  | 0·039     | 0·096  | 0·377  | 0·624  | 0·871 | 0·299  | 0·616  |

During the RCP, participants in the placebo group received placebo while participants in the inebilizumab received inebilizumab. During the OLP (which started after the end of the RCP), all participants received inebilizumab. By OLP W26, all participants had been receiving inebilizumab for at least 28 weeks (RCP placebo) and up to 54 weeks (RCP inebilizumab). Plasma cell signature was not measured after OLP W26. *p* values between RCP inebilizumab and RCP placebo participants were calculated using the Mann–Whitney U test. FC=Fold Change, HD=Healthy Donor, OLP=Open-Label Period, Q=Quartile, RCP=Randomised Controlled Period; W=Week.

**Supplementary Table S4: Decreases in NMOSD progression observed with long-term inebilizumab treatment.**

**Adjudicated attacks**

| Time period                                                  | N   | Number of participants with attack (%) | Total number of attacks | Total patient-years of observation | AAR  | Lower 95% CI | Upper 95% CI |
|--------------------------------------------------------------|-----|----------------------------------------|-------------------------|------------------------------------|------|--------------|--------------|
| <b>ITT</b>                                                   |     |                                        |                         |                                    |      |              |              |
| Placebo RCP                                                  | 56  | 22 (39%)                               | 22                      | 23                                 | 1·01 | 0·79         | 1·23         |
| 0·6 months after inebilizumab treatment start (1st dose)     | 225 | 29 (13%)                               | 31                      | 111                                | 0·28 | 0·23         | 0·33         |
| 0·5–1·5 years after inebilizumab treatment start (2–3 doses) | 213 | 14 (7%)                                | 14                      | 208                                | 0·07 | 0·05         | 0·09         |
| 1·5–2·5 years after inebilizumab treatment start (4–5 doses) | 197 | 11 (6%)                                | 11                      | 189                                | 0·06 | 0·04         | 0·08         |
| >2·5 years after inebilizumab treatment start (>5 doses)     | 168 | 6 (4%)                                 | 7                       | 222                                | 0·03 | 0·02         | 0·04         |
| <b>Participants randomised to placebo during RCP</b>         |     |                                        |                         |                                    |      |              |              |
| Placebo RCP                                                  | 56  | 22 (39%)                               | 22                      | 23                                 | 1·12 | 0·86         | 1·38         |
| 0·6 months after inebilizumab treatment start (1st dose)     | 51  | 7 (14%)                                | 9                       | 25                                 | 0·35 | 0·23         | 0·48         |
| 0·5–1·5 years after inebilizumab treatment start (2–3 doses) | 49  | 2 (4%)                                 | 2                       | 48                                 | 0·04 | 0·01         | 0·07         |
| 1·5–2·5 years after inebilizumab treatment start (4–5 doses) | 46  | 2 (4%)                                 | 2                       | 41                                 | 0·05 | 0·01         | 0·08         |
| >2·5 years after inebilizumab treatment start (>5 doses)     | 31  | 2 (6%)                                 | 3                       | 41                                 | 0·07 | 0·03         | 0·12         |
| <b>Participants randomised to inebilizumab during RCP</b>    |     |                                        |                         |                                    |      |              |              |
| 0–6 months after inebilizumab treatment start (1st dose)     | 174 | 22 (13%)                               | 22                      | 85                                 | 0·26 | 0·20         | 0·31         |
| 0·5–1·5 years after inebilizumab treatment start (2–3 doses) | 164 | 12 (7%)                                | 12                      | 160                                | 0·08 | 0·05         | 0·10         |
| 1·5–2·5 years after inebilizumab treatment start (4–5 doses) | 151 | 9 (6%)                                 | 9                       | 148                                | 0·06 | 0·04         | 0·08         |
| >2·5 years after inebilizumab treatment start (>5 doses)     | 137 | 4 (3%)                                 | 4                       | 182                                | 0·02 | 0·01         | 0·03         |

## EDSS score worsening

| Time period                                                  | N   | Number of participants with EDSS score increase (%) | Total points increased | Total patient-years of observation | Rate/year | Lower 95% CI | Upper 95% CI |
|--------------------------------------------------------------|-----|-----------------------------------------------------|------------------------|------------------------------------|-----------|--------------|--------------|
| <b>ITT</b>                                                   |     |                                                     |                        |                                    |           |              |              |
| Placebo RCP                                                  | 56  | 20 (36%)                                            | 28·5                   | 21                                 | 1·66      | 1·26         | 2·05         |
| 0-6 months after inebilizumab treatment start (1st dose)     | 222 | 39 (18%)                                            | 44·0                   | 107                                | 0·43      | 0·36         | 0·51         |
| 0·5-1·5 years after inebilizumab treatment start (2-3 doses) | 211 | 37 (18%)                                            | 34·5                   | 206                                | 0·17      | 0·14         | 0·20         |
| 1·5-2·5 years after inebilizumab treatment start (4-5 doses) | 194 | 43 (22%)                                            | 33·5                   | 183                                | 0·18      | 0·15         | 0·22         |
| >2·5 years after inebilizumab treatment start (>5 doses)     | 140 | 26 (19%)                                            | 30·5                   | 204                                | 0·15      | 0·12         | 0·19         |
| <b>Participants randomised to placebo during RCP</b>         |     |                                                     |                        |                                    |           |              |              |
| Placebo RCP                                                  | 56  | 20 (36%)                                            | 28·5                   | 21                                 | 1·82      | 1·33         | 2·31         |
| 0-6 months after inebilizumab treatment start (1st dose)     | 50  | 7 (14%)                                             | 10·5                   | 27                                 | 0·40      | 0·25         | 0·55         |
| 0·5-1·5 years after inebilizumab treatment start (2-3 doses) | 49  | 12 (24%)                                            | 13·5                   | 47                                 | 0·31      | 0·20         | 0·42         |
| 1·5-2·5 years after inebilizumab treatment start (4-5 doses) | 44  | 9 (20%)                                             | 6·0                    | 38                                 | 0·16      | 0·08         | 0·23         |
| >2·5 years after inebilizumab treatment start (>5 doses)     | 30  | 5 (17%)                                             | 7·5                    | 39                                 | 0·20      | 0·10         | 0·29         |
| <b>Participants randomised to inebilizumab during RCP</b>    |     |                                                     |                        |                                    |           |              |              |
| 0-6 months after inebilizumab treatment start (1st dose)     | 172 | 32 (19%)                                            | 33·5                   | 80                                 | 0·43      | 0·35         | 0·51         |
| 0·5-1·5 years after inebilizumab treatment start (2-3 doses) | 162 | 25 (15%)                                            | 21·0                   | 159                                | 0·13      | 0·10         | 0·16         |
| 1·5-2·5 years after inebilizumab treatment start (4-5 doses) | 150 | 34 (23%)                                            | 27·5                   | 145                                | 0·19      | 0·15         | 0·23         |
| >2·5 years after inebilizumab treatment start (>5 doses)     | 110 | 21 (19%)                                            | 23·0                   | 166                                | 0·14      | 0·11         | 0·17         |

## New/enlarging T2 MRI lesions\*

| Time period                                                  | N   | Number of participants with new/enlarging T2 MRI lesions (%) | Total number of lesions | Total patient-years of observation | Rate/year | Lower 95% CI | Upper 95% CI |
|--------------------------------------------------------------|-----|--------------------------------------------------------------|-------------------------|------------------------------------|-----------|--------------|--------------|
| <b>Participants randomized to inebilizumab during RCP</b>    |     |                                                              |                         |                                    |           |              |              |
| 0–6 months after inebilizumab treatment start (1st dose)     | 154 | 44 (29%)                                                     | 89                      | 73                                 | 1·58      | 1·31         | 1·85         |
| 0·5–1·5 years after inebilizumab treatment start (2–3 doses) | 145 | 50 (34%)                                                     | 101                     | 132                                | 0·98      | 0·81         | 1·15         |
| 1·5–2·5 years after inebilizumab treatment start (4–5 doses) | 122 | 42 (34%)                                                     | 85                      | 112                                | 0·76      | 0·61         | 0·90         |
| >2·5 years after inebilizumab treatment start (>5 doses)     | 85  | 38 (45%)                                                     | 70                      | 122                                | 0·7       | 0·55         | 0·86         |

## Inpatient hospitalisations

| Time period                                                  | N   | Number of participants with hospitalisations (%) | Total number of hospitalisations | Total patient-years of observation | Rate/year | Lower 95% CI | Upper 95% CI |
|--------------------------------------------------------------|-----|--------------------------------------------------|----------------------------------|------------------------------------|-----------|--------------|--------------|
| <b>ITT</b>                                                   |     |                                                  |                                  |                                    |           |              |              |
| Placebo RCP                                                  | 56  | 8 (14%)                                          | 10                               | 23                                 | 0·53      | 0·28         | 0·78         |
| 0–6 months after inebilizumab treatment start (1st dose)     | 225 | 23 (10%)                                         | 32                               | 111                                | 0·33      | 0·25         | 0·41         |
| 0·5–1·5 years after inebilizumab treatment start (2–3 dose)  | 213 | 21 (10%)                                         | 34                               | 208                                | 0·17      | 0·13         | 0·21         |
| 1·5–2·5 years after inebilizumab treatment start (4–5 doses) | 197 | 14 (7%)                                          | 18                               | 189                                | 0·10      | 0·07         | 0·12         |
| >2·5 years after inebilizumab treatment start (>5 doses)     | 168 | 8 (5%)                                           | 11                               | 222                                | 0·05      | 0·03         | 0·07         |
| <b>Participants randomised to placebo during RCP</b>         |     |                                                  |                                  |                                    |           |              |              |
| Placebo RCP                                                  | 56  | 8 (14%)                                          | 10                               | 23                                 | 0·54      | 0·28         | 0·80         |
| 0–6 months after inebilizumab treatment start (1st dose)     | 51  | 5 (10%)                                          | 14                               | 25                                 | 0·55      | 0·29         | 0·81         |
| 0·5–1·5 years after inebilizumab treatment start (2–3 doses) | 49  | 5 (10%)                                          | 7                                | 48                                 | 0·15      | 0·07         | 0·24         |

|                                                              |     |          |    |     |      |      |      |
|--------------------------------------------------------------|-----|----------|----|-----|------|------|------|
| 1·5–2·5 years after inebilizumab treatment start (4–5 doses) | 46  | 4 (9%)   | 5  | 41  | 0·12 | 0·05 | 0·19 |
| >2·5 years after inebilizumab treatment start (>5 doses)     | 31  | 1 (3%)   | 2  | 41  | 0·05 | 0·00 | 0·09 |
| <b>Participants randomised to inebilizumab during RCP</b>    |     |          |    |     |      |      |      |
| 0–6 months after inebilizumab treatment start (1st dose)     | 174 | 18 (10%) | 18 | 85  | 0·25 | 0·17 | 0·32 |
| 0·5–1·5 years after inebilizumab treatment start (2–3 doses) | 164 | 16 (10%) | 27 | 160 | 0·17 | 0·12 | 0·22 |
| 1·5–2·5 years after inebilizumab treatment start (4–5 doses) | 151 | 10 (7%)  | 13 | 148 | 0·09 | 0·06 | 0·12 |
| >2·5 years after inebilizumab treatment start (>5 doses)     | 137 | 7 (5%)   | 9  | 182 | 0·05 | 0·03 | 0·08 |

All participants during the first dosing period of inebilizumab treatment (first dosing interval) and yearly afterwards divided by RCP randomisation and ITT.

\*T2 MRI lesions in placebo RCP participants and in the combined ITT group could not be included in this analysis because MRI data during the OLP was only recorded annually and RCP placebo participants were on a schedule 6 months behind RCP inebilizumab participants.

AAR=Annualised Attack Rate, CI=Confidence Interval, EDSS=Expanded Disability Status Scale, ITT=Intention-to-treat, MRI=Magnetic Resonance Imaging, NMOSD=Neuromyelitis Optica Spectrum Disorder, RCP=Randomised Controlled Period.

**Supplementary Table S5: 6-month B-cell counts versus long-term disease activity in participants divided by RCP treatment group.**

|                                                           |                                         | RR (95% CI)       | Number of participants | Total patient-years of observation | p         |
|-----------------------------------------------------------|-----------------------------------------|-------------------|------------------------|------------------------------------|-----------|
| <b>Participants randomised to placebo during RCP</b>      |                                         |                   |                        |                                    |           |
| Annualised attack rate                                    | Log <sub>10</sub> memory B cells        | 0.95 (0.16–5.75)  | 37                     | 103                                | 0.955     |
|                                                           | Log <sub>10</sub> 6-month CD20+ B cells | 1.44 (0.45–4.62)  | 43                     | 112                                | 0.541     |
| Rate of new/enlarging T2 MRI lesions                      | Log <sub>10</sub> memory B cells        | 0.91 (0.58–1.44)  | 33                     | 75                                 | 0.689     |
|                                                           | Log <sub>10</sub> 6-month CD20+ B cells | 0.97 (0.68–1.39)  | 37                     | 81                                 | 0.864     |
| EDSS worsening rate                                       | Log <sub>10</sub> memory B cells        | 3.86 (0.95–15.72) | 37                     | 99                                 | 0.060     |
|                                                           | Log <sub>10</sub> 6-month CD20+ B cells | 2.65 (0.85–8.27)  | 43                     | 108                                | 0.093     |
| Inpatient hospitalisation rate                            | Log <sub>10</sub> memory B cells        | 2.23 (0.54–9.19)  | 37                     | 105                                | 0.267     |
|                                                           | Log <sub>10</sub> 6-month CD20+ B cells | 1.55 (0.51–4.73)  | 43                     | 114                                | 0.445     |
| <b>Participants randomised to inebilizumab during RCP</b> |                                         |                   |                        |                                    |           |
| Annualised attack rate                                    | Log <sub>10</sub> memory B cells        | 2.22 (1.15–4.27)  | 133                    | 424                                | 0.017     |
|                                                           | Log <sub>10</sub> 6-month CD20+ B cells | 1.58 (0.99–2.52)  | 154                    | 470                                | 0.053     |
| Rate of new/enlarging T2 MRI lesions                      | Log <sub>10</sub> memory B cells        | 2.27 (1.59–3.24)  | 112                    | 317                                | 6.460e-06 |
|                                                           | Log <sub>10</sub> 6-month CD20+ B cells | 1.8 (1.41–2.29)   | 129                    | 351                                | 1.850e-06 |
| EDSS worsening rate                                       | Log <sub>10</sub> memory B cells        | 1.47 (0.89–2.42)  | 132                    | 409                                | 0.133     |
|                                                           | Log <sub>10</sub> 6-month CD20+ B cells | 1.15 (0.8–1.65)   | 153                    | 454                                | 0.455     |
| Inpatient hospitalisation rate                            | Log <sub>10</sub> memory B cells        | 1.84 (0.93–3.65)  | 133                    | 428                                | 0.082     |
|                                                           | Log <sub>10</sub> 6-month CD20+ B cells | 1.63 (0.99–2.68)  | 154                    | 474                                | 0.054     |

Negative binomial regression analysis of B-cell counts at 6 months post-treatment (W28 RCP for participants treated with inebilizumab who completed the RCP, W26 OLP for participants randomised to placebo and participants treated with inebilizumab who transitioned into OLP early) versus the annualised attack rate, rate of new/enlarging T2 lesions, EDSS worsening (participants/year), and inpatient hospitalisations that occurred after the first dosing period of inebilizumab treatment. CI=Confidence Interval, EDSS=Expanded Disability Status Scale, MRI=Magnetic Resonance Imaging, RCP=Randomised Controlled Period, RR=Rate Ratio, W26=Week 26 After Treatment Initiation, W28=Week 28 After Treatment Initiation.

## SUPPLEMENTARY REFERENCES

1. Wingerchuk DM, Lennon VA, Pittock SJ, Lucchinetti CF, Weinshenker BG. Revised diagnostic criteria for neuromyelitis optica. *Neurology* 2006; **66**: 1485-9.
2. Bedi GS, Brown AD, Delgado SR, Usmani N, Lam BL, Sheremata WA. Impact of rituximab on relapse rate and disability in neuromyelitis optica. *Mult Scler* 2011; **17**: 1225-30.
3. Costanzi C, Matiello M, Lucchinetti CF, et al. Azathioprine: tolerability, efficacy, and predictors of benefit in neuromyelitis optica. *Neurology* 2011; **77**: 659-66.
4. Jacob A, Weinshenker BG, Violich I, et al. Treatment of neuromyelitis optica with rituximab: retrospective analysis of 25 patients. *Arch Neurol* 2008; **65**: 1443-8.
5. Kim SH, Kim W, Li XF, Jung IJ, Kim HJ. Repeated treatment with rituximab based on the assessment of peripheral circulating memory B cells in patients with relapsing neuromyelitis optica over 2 years. *Arch Neurol* 2011; **68**: 1412-20.
6. Pittock SJ, Lennon VA, McKeon A, et al. Eculizumab in AQP4-IgG-positive relapsing neuromyelitis optica spectrum disorders: an open-label pilot study. *Lancet Neurol* 2013; **12**: 554-62.
